# Supplementary material for: Visible light mediated intermolecular [3 + 2] annulation of cyclopropylanilines with alkynes
Source: publisher site journal article supplement (doi:10.3762/bjoc.10.96), 2014-04-29

**Supporting Information**  
for  
**Visible light mediated intermolecular [3 + 2] annulation of  
cyclopropylanilines with alkynes**

Theresa H. Nguyen, Soumitra Maity and Nan Zheng\*

Address: Department of Chemistry and Biochemistry, University of Arkansas,  
Fayetteville, Arkansas, 72701, USA

Email: Nan Zheng\* - [nzheng@uark.edu](mailto:nzheng@uark.edu)

\* Corresponding author

**Experimental procedures, compound characterization,  
and NMR spectra**

*Table of Contents*

|                                                                                     |           |
|-------------------------------------------------------------------------------------|-----------|
| <b>General considerations</b>                                                       | <b>S1</b> |
| <b>General procedure 1: Preparation of <i>N</i>-cyclopropylanilines</b>             | <b>S2</b> |
| <b>General procedure 2: [3 + 2] annulation</b>                                      | <b>S4</b> |
| <b>Experimental procedure (intramolecular-Heck reaction) and spectroscopic data</b> | <b>S5</b> |
| <b>NMR Spectra</b>                                                                  | <b>S9</b> |

**General considerations**

All reactions were carried out under a nitrogen atmosphere. Nitromethane (CH<sub>3</sub>NO<sub>2</sub>), acetonitrile (CH<sub>3</sub>CN), and dimethylformamide (DMF) were pre-dried over molecular sieves. Toluene was collected under argon from a solvent purification system. Column chromatography was performed using silica gel (230–400 mesh). All new compounds were characterized by <sup>1</sup>H NMR, <sup>13</sup>C NMR, IR spectroscopy, high-resolution mass spectroscopy (HRMS), and melting point. Nuclear magnetic resonance (NMR) spectra were obtained on a Bruker Avance DPX-300 and Bruker Avance DPX-400. Chemical shifts (δ) were reported in parts per million (ppm) relative to residual proton signals in CDCl<sub>3</sub> (7.26 ppm, 77.23 ppm) at room temperature. Relative configurations of new compounds were established by HMQC experiments. IR spectra were recorded (thin film on NaCl plates) on a PerkinElmer Spectrum 100 series instrument. High

resolution mass spectra were recorded on a Bruker Ultraflex II TOF/TOF mass spectrometer. Gas chromatography/mass spectroscopy (GC/MS) analyses were performed on an Agilent 6890N Network GC System/5973 inert Mass Selective Detector. Gas chromatography analyses were performed using a Shimadzu GC-2010 Plus instrument. Melting points (m.p.) were recorded using Stuart SMP10 Melting Point Apparatus and were uncorrected.

### General procedure 1: Preparation of *N*-cyclopropylanilines

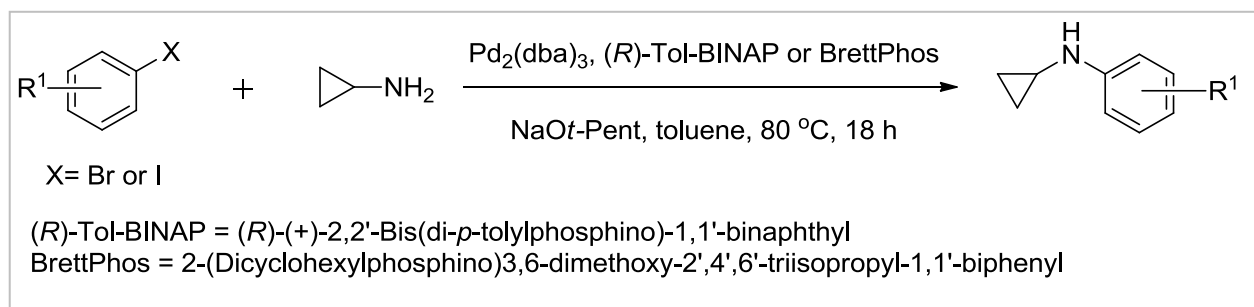

To an oven-dried test tube equipped with a stir bar were added 0.01 mmol of Pd<sub>2</sub>(dba)<sub>3</sub> and 0.03 mmol of ligand ((*R*)-Tol-BINAP or BrettPhos). Glove box was used to add 1.5 mmol of NaOt-Pent and the tube was sealed with a Teflon screw cap. 1 mmol of aromatic halide, 1.6 mmol of cyclopropylamine, and 2 mL of toluene were then added to the reaction mixture and heated at 80 °C for 18 h. After completion, the reaction mixture was cooled to room temperature, diluted with diethyl ether, filtered over a short pad of silica gel, and concentrated in vacuum. Purification by flash chromatography on silica gel afforded *N*-cyclopropylaniline.

**3,5-Dimethyl-*N*-cyclopropylaniline.** Following the above procedure with 5-bromo-*m*-xylene (680 μL, 5 mmol, 1 equiv) and BrettPhos (80.5 mg, 0.15 mmol, 3 mol % equiv), product was isolated after flash chromatography on silica gel (1:20 EtOAc/hexane) as a pale-yellowish oil (774 mg, 96%); IR ν<sub>max</sub> (cm<sup>-1</sup>) 3387, 3087, 2961, 1604, 1477, 1364, 1336, 824; <sup>1</sup>H NMR (400 MHz, Chloroform-*d*) δ 6.44 (dddd, *J* = 10.2, 2.9, 1.5, 0.7 Hz, 3H), 4.32 (s, 1H), 2.42 (tt, *J* = 6.4, 3.5 Hz, 1H), 2.30 – 2.20 (m, 6H), 0.76 – 0.63 (m, 2H), 0.52 (dddd, *J* = 4.9, 3.9, 3.3, 2.1 Hz, 2H); <sup>13</sup>C NMR (75 MHz, CDCl<sub>3</sub>) δ 148.66, 138.68, 119.62, 110.95, 25.17, 21.43, 7.34. GC/MS *m/z* [M+H]<sup>+</sup>, calc'd for C<sub>11</sub>H<sub>15</sub>N 162; found 162.12.

***N*-Cyclopropyl-2-biphenylamine.** Following the above procedure with 2-bromobiphenyl (860 μL, 5 mmol, 1 equiv) and (*R*)-Tol-BINAP (102 mg, 0.15 mmol, 3 mol % equiv), product was isolated after flash chromatography on silica gel (1:20 EtOAc/hexane) as a colorless oil (889 mg, 85%).<sup>1</sup>

**4-Cyano-*N*-cyclopropylaniline.** Following the above procedure with 4-bromobenzonitrile (1.82 g, 10 mmol, 1 equiv) and (*R*)-Tol-BINAP (204 mg, 0.3 mmol, 3 mol % equiv), product was isolated after flash chromatography on silica gel (1:3 EtOAc/hexane) as a pale-yellowish solid

<sup>1</sup> Maity, S.; Zhu, M.-Z.; Shinabery, R. S.; Zheng, N. *Angew. Chem. Int. Ed.* **2012**, *51*, 222–226.

(836 mg, 53%); IR  $\nu_{\text{max}}$  ( $\text{cm}^{-1}$ ) 3364, 2991, 2210, 1603, 1519, 1338, 1166, 825;  $^1\text{H}$  NMR (400 MHz, Chloroform-*d*)  $\delta$  7.52 – 7.39 (m, 2H), 6.79 – 6.70 (m, 2H), 4.61 (s, 1H), 2.47 (tt,  $J = 6.6$ , 3.6, 0.6 Hz, 1H), 0.88 – 0.74 (m, 2H), 0.63 – 0.50 (m, 2H);  $^{13}\text{C}$  NMR (101 MHz,  $\text{CDCl}_3$ )  $\delta$  151.96, 133.53, 120.53, 112.78, 99.20, 24.60, 7.63; GC/MS  $m/z$   $[\text{M}+\text{H}]^+$ , calc'd for  $\text{C}_{10}\text{H}_{10}\text{N}_2$  159; found 159.09.

**4-Methoxy-*N*-cyclopropylaniline.** Following the above procedure with 4-bromoanisole (628  $\mu\text{L}$ , 5 mmol, 1 equiv) and BrettPhos (80.5 mg, 0.15 mmol, 3 mol % equiv), product was isolated after flash chromatography on silica gel (1:5 EtOAc/hexane) as a pale-yellowish oil (602 mg, 74%); IR  $\nu_{\text{max}}$  ( $\text{cm}^{-1}$ ) 3378, 3002, 2947, 2832, 1607, 1512, 1365, 1237, 1035, 821;  $^1\text{H}$  NMR (400 MHz, Chloroform-*d*)  $\delta$  6.87 – 6.70 (m, 4H), 3.95 (d,  $J = 14.8$  Hz, 1H), 3.76 (s, 3H), 2.39 (tt,  $J = 6.5$ , 3.6 Hz, 1H), 0.75 – 0.65 (m, 2H), 0.55 – 0.46 (m, 2H);  $^{13}\text{C}$  NMR (101 MHz,  $\text{CDCl}_3$ )  $\delta$  152.34, 142.89, 114.80, 114.19, 55.85, 25.94, 7.30; GC/MS  $m/z$   $[\text{M}+\text{H}]^+$ , calc'd for  $\text{C}_{10}\text{H}_{13}\text{NO}$  164; found 164.10.

**2-Bromo-*N*-cyclopropylaniline.** Following the above procedure with 1-bromo-2-iodobenzene (128  $\mu\text{L}$ , 1 mmol, 1 equiv) and (*R*)-Tol-BINAP (20.4 mg, 0.03 mmol, 3 mol % equiv), product was isolated after flash chromatography on silica gel (1:150 EtOAc/hexane) as a colorless oil (160 mg, 75%).<sup>2</sup>

**4-*tert*-Butyldimethylsilyl ether-*N*-cyclopropylaniline.** Following the above procedure with (4-bromophenoxy)-*tert*-butyldimethylsilane (490  $\mu\text{L}$ , 2 mmol, 1 equiv) and BrettPhos (32.2 mg, 0.06 mmol, 3 mol % equiv), product was isolated after flash chromatography on silica gel (1:5 EtOAc/hexane) as a colorless oil (486 mg, 92%); IR  $\nu_{\text{max}}$  ( $\text{cm}^{-1}$ ) 3377, 2945, 2858, 1509, 1465, 1364, 1249, 916, 832;  $^1\text{H}$  NMR (400 MHz, Chloroform-*d*)  $\delta$  6.71 – 6.49 (m, 4H), 3.86 (s, 1H), 2.29 (tt,  $J = 6.6$ , 3.1 Hz, 1H), 0.94 – 0.83 (m, 9H), 0.63 – 0.52 (m, 2H), 0.44 – 0.33 (m, 2H), 0.11 – 0.02 (m, 6H);  $^{13}\text{C}$  NMR (101 MHz,  $\text{CDCl}_3$ )  $\delta$  147.67, 143.11, 120.53, 114.02, 25.90, 25.79, 18.20, 7.27, -4.45; GC/MS  $m/z$   $[\text{M}+\text{H}]^+$ , calc'd for  $\text{C}_{15}\text{H}_{25}\text{NOSi}$  264; found 264.17.

**2-Isopropyl-*N*-cyclopropylaniline.** Following the above procedure with 1-bromo-2-isopropylbenzene (150  $\mu\text{L}$ , 1 mmol, 1 equiv) and (*R*)-Tol-BINAP (20.4 mg, 0.03 mmol, 3 mol % equiv), product was isolated after flash chromatography on silica gel (100:1 EtOAc/hexane) as a colorless oil (106 mg, 60%); IR  $\nu_{\text{max}}$  ( $\text{cm}^{-1}$ ) 3420, 3007, 2961, 2870, 1603, 1503, 1451, 1365, 1302, 1039, 746;  $^1\text{H}$  NMR (400 MHz, Chloroform-*d*)  $\delta$  7.21 – 7.07 (m, 3H), 6.84 – 6.74 (m, 1H), 4.21 (s, 1H), 2.80 (p,  $J = 6.8$  Hz, 1H), 2.45 (tt,  $J = 6.4$ , 3.6 Hz, 1H), 1.29 – 1.23 (m, 6H), 0.82 – 0.73 (m, 2H), 0.61 – 0.52 (m, 2H);  $^{13}\text{C}$  NMR (101 MHz,  $\text{CDCl}_3$ )  $\delta$  145.40, 131.90, 126.62, 124.76, 117.73, 111.80, 27.11, 25.51, 22.52, 22.36, 7.74; GC/MS  $m/z$   $[\text{M}+\text{H}]^+$ , calc'd for  $\text{C}_{12}\text{H}_{17}\text{N}$  176; found 176.14.

**4-Trifluoromethyl-*N*-cyclopropylaniline.** An oven-dried schlenk tube was charged with CuI (9.5 mg, 0.05 mmol),  $\text{K}_2\text{CO}_3$  (276 mg, 2 mmol), proline (23 mg, 0.2 mmol), cyclopropylamine (140  $\mu\text{L}$ , 2 mmol), 4-iodobenzotrifluoride (150  $\mu\text{L}$ , 1 mmol), DMSO (2 mL) and a stir bar. After purging with argon for a few seconds, the tube was sealed with a Teflon screw cap. The mixture was heated at 70  $^\circ\text{C}$  for 12 h. The reaction mixture was then cooled to room temperature,

<sup>2</sup> Rousseaux, S.; Liégault, B.; Fagnou, K. *Chem Sci.* **2012**, *3*, 244–248.

quenched with brine and diluted with diethyl ether. The organic layer was separated and the aqueous layer was extracted with diethyl ether. The combined organic layers were dried over Na<sub>2</sub>SO<sub>4</sub>, filtered, and concentrated under vacuum. Purification of the residual mass by silica gel flash chromatography (5% EtOAc/hexane) afforded product (193 mg, 96%) as a yellowish oil.<sup>1</sup>

## General procedure 2: [3 + 2] annulation

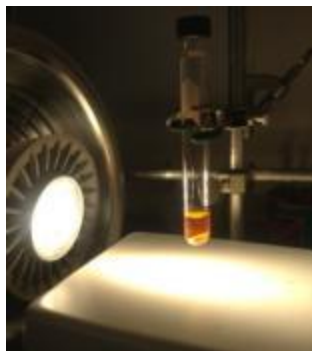

An oven-dried test tube equipped with a stir bar was charged with [Ru(bpz)<sub>3</sub>](PF<sub>6</sub>)<sub>2</sub>·2H<sub>2</sub>O<sup>3</sup> (2 mol %), cyclopropylaniline derivative (0.2 mmol), alkyne derivative (1.0 mmol), and dry CH<sub>3</sub>NO<sub>2</sub> (2 mL). The test tube was sealed with a Teflon screw cap and the reaction mixture was degassed by Freeze–Pump–Thaw cycles and irradiated at room temperature with one LED (18 watts) positioned 8 cm from the reaction vessel. After the reaction was complete, monitored by TLC, the mixture was diluted with diethyl ether and filtered through a short pad of silica gel. The solution was concentrated in vacuum and purified by silica gel flash chromatography to afford the desired cycloadducts.

## Catalyst optimization

Following the above procedure, *N*-cyclopropyl-2-biphenylamine (**1**, 42 mg, 0.2 mmol), phenylacetylene (**2**, 116  $\mu$ L, 1.0 mmol), [Ru(bpz)<sub>3</sub>](PF<sub>6</sub>)<sub>2</sub>·2H<sub>2</sub>O<sup>3</sup> (**4a**, 3.8 mg, 2 mol %), and solvent (2 mL) were mixed and irradiated with a LED light for 8 h. The reaction mixture was then diluted with Et<sub>2</sub>O (2 mL) and *n*-dodecane (45  $\mu$ L) was added as the internal standard. An aliquot (0.5 mL) was filtered through a syringe filter, diluted to 1 mL, and analyzed by GC.

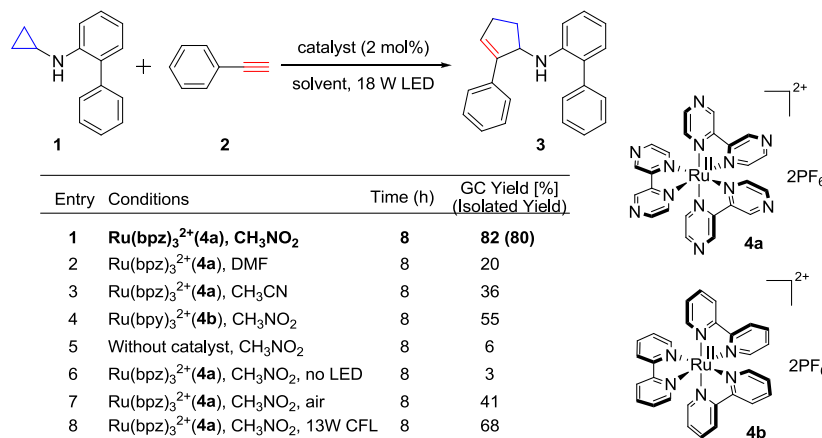

<sup>3</sup> Rillema, D. P.; Allen, G.; Meyer, T. J.; Conrad, D. *Inorg. Chem.* **1983**, 22, 1617–1622.

## Procedure for intramolecular-Heck application

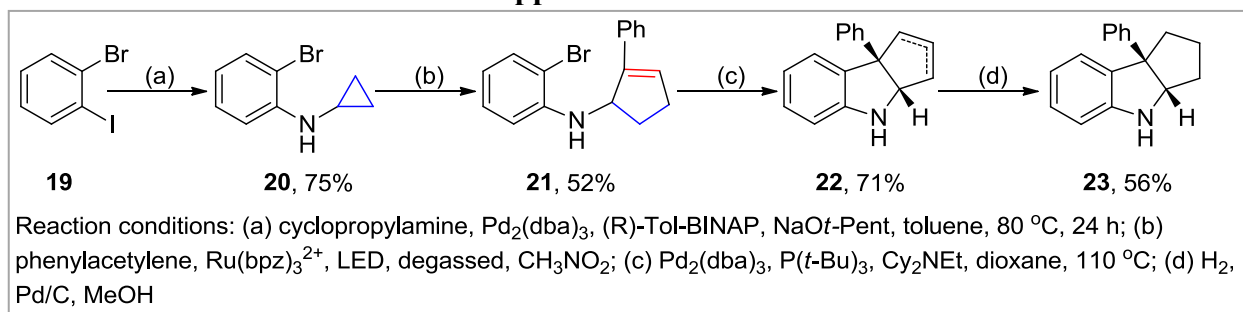

General procedure 2 was performed to provide the [3 + 2] product **21**. To an oven-dried test tube equipped with a stir were added **21** (0.2 mmol) and  $\text{Pd}_2(\text{dba})_3$  (1.5 mol %). Inside the glovebox were then added  $\text{Cy}_2\text{NMe}$  (1.1 equiv),  $\text{P}(t\text{-Bu})_3$  (3.0 mol %), and dioxane. The reaction vessel was heated at 110 °C for 16.5 h. After completion, the reaction was quenched with diethyl ether and filtered through a short pad of silica gel. The solution was concentrated in vacuum and purified by silica gel flash chromatography (10:1 hexane/EtOAc) to afford desired product **22** (33 mg, 71% yield). *Note:  $\text{Cy}_2\text{NMe}$  and dioxane were degassed by Freeze-Pump-Thaw cycles before taken into glovebox.*

For the hydrogenation: To a clean dried 3-neck round bottom flask equipped with a stir bar was added **22** (0.1 mmol). After stirring in anhydrous MeOH (0.4 mL) for 5 min. Pd(C) (10 mol %) was added carefully under  $\text{N}_2$  atmosphere. A balloon filled with  $\text{H}_2$  was equipped to the flask and stirred for 22 h at room temperature. After completion, celite was added to the reaction and stirred for additional 5 min. prior to filtering through a pad of celite and washing with MeOH. The solution was concentrated in vacuum and purified by silica gel flash chromatography (10:1 hexane/EtOAc) to afford **23** (13.1 mg, 56%).

**3**: white yellowish solid, m.p. 113-115 °C, (48 mg, 77%). Silica gel column chromatography (15:1 hexane/EtOAc). IR  $\nu_{\text{max}}$  ( $\text{cm}^{-1}$ ) 3300, 2939, 1559, 11505, 1488, 1436, 1312, 1071, 755, 695;  $^1\text{H}$  NMR (400 MHz, Chloroform-*d*)  $\delta$  7.37 – 7.32 (m, 2H), 7.24 – 7.19 (m, 3H), 7.19 – 7.14 (m, 2H), 7.11 (q,  $J = 1.0$  Hz, 4H), 7.00 (dt,  $J = 7.4, 1.5$  Hz, 1H), 6.83 – 6.76 (m, 1H), 6.70 (tt,  $J = 7.4, 1.0$  Hz, 1H), 6.18 (td,  $J = 2.5, 1.1$  Hz, 1H), 4.83 (d,  $J = 7.2$  Hz, 1H), 4.00 (s, 1H), 2.54 – 2.38 (m, 2H), 2.36 – 2.25 (m, 1H), 1.90 (ddt,  $J = 12.8, 8.3, 3.0$  Hz, 1H);  $^{13}\text{C}$  NMR (101 MHz,  $\text{CDCl}_3$ )  $\delta$  144.50, 142.88, 139.28, 134.79, 130.51, 129.94, 129.16, 128.73, 128.72, 128.42, 127.73, 127.33, 126.95, 126.41, 116.70, 110.87, 59.55, 31.88, 31.08; HRMS (ESI)  $m/z$   $[\text{M}+\text{H}]^+$ , calc'd for  $\text{C}_{23}\text{H}_{21}\text{N}$  312.1742; found 312.1708.

**5**: pale yellowish oil, (32.5 mg, 62%). Silica gel column chromatography (5:1 hexane/EtOAc). IR  $\nu_{\text{max}}$  ( $\text{cm}^{-1}$ ) 3401, 2918, 1599, 1496, 1337, 1183, 820, 757, 691;  $^1\text{H}$  NMR (400 MHz, Chloroform-*d*)  $\delta$  7.45 (ddd,  $J = 6.4, 3.8, 1.6$  Hz, 2H), 7.30 – 7.21 (m, 2H), 7.21 – 7.14 (m, 1H), 6.43 – 6.30 (m, 2H), 6.27 – 6.21 (m, 2H), 4.88 – 4.77 (m, 1H), 3.68 (s, 1H), 2.60 (dddd,  $J = 15.3, 7.4, 6.0, 3.6$  Hz, 1H), 2.45 (ddt,  $J = 17.6, 8.9, 3.1$  Hz, 1H), 2.35 – 2.25 (m, 1H), 2.23 – 2.18 (m, 6H), 1.99 (ddt,  $J = 13.4, 8.3, 2.8$  Hz, 1H);  $^{13}\text{C}$  NMR (101 MHz,  $\text{CDCl}_3$ )  $\delta$  147.66, 142.82, 138.99, 134.64, 129.97, 128.53, 127.31, 126.20, 119.05, 110.91, 58.91, 31.74, 30.99, 21.58; HRMS (ESI)  $m/z$   $[\text{M}+\text{H}]^+$ , calc'd for  $\text{C}_{19}\text{H}_{21}\text{N}$  264.1737; found 264.1708.

**6**: yellow/orange oil, (24.1 mg, 43%). Silica gel column chromatography (25:1 hexane/EtOAc). IR  $\nu_{\text{max}}$  ( $\text{cm}^{-1}$ ) 3440, 2960, 1602, 1503, 1448, 1304, 1038, 745, 692;  $^1\text{H}$  NMR (400 MHz,

Chloroform-*d*)  $\delta$  7.51 – 7.42 (m, 2H), 7.29 – 7.20 (m, 2H), 7.20 – 7.07 (m, 3H), 6.83 – 6.66 (m, 2H), 6.38 (ddd,  $J$  = 3.2, 2.4, 1.0 Hz, 1H), 4.86 (d,  $J$  = 7.1 Hz, 1H), 3.75 (s, 1H), 2.67 – 2.55 (m, 2H), 2.33 (ddt,  $J$  = 13.1, 8.9, 7.1 Hz, 1H), 1.99 (ddt,  $J$  = 13.4, 8.2, 2.8 Hz, 1H), 1.11 (d,  $J$  = 6.8 Hz, 3H), 1.00 (d,  $J$  = 6.8 Hz, 3H);  $^{13}\text{C}$  NMR (101 MHz,  $\text{CDCl}_3$ )  $\delta$  144.26, 142.94, 134.63, 132.23, 130.07, 128.52, 127.39, 126.76, 126.25, 125.06, 116.95, 110.81, 59.28, 31.82, 31.12, 27.08, 22.28, 22.19; HRMS (ESI)  $m/z$   $[\text{M}+\text{H}]^+$ , calc'd for  $\text{C}_{20}\text{H}_{23}\text{N}$  278.1891; found 278.1864.

**7:** reddish-brown oil, (23.9 mg, 45%). Silica gel column chromatography (10:1 hexane/EtOAc). IR  $\nu_{\text{max}}$  ( $\text{cm}^{-1}$ ) 3394, 2929, 1510, 1231, 1178, 1038, 818, 753, 693;  $^1\text{H}$  NMR (400 MHz, Chloroform-*d*)  $\delta$  7.48 – 7.39 (m, 2H), 7.29 – 7.19 (m, 2H), 7.19 – 7.11 (m, 1H), 6.78 – 6.69 (m, 2H), 6.60 – 6.49 (m, 2H), 6.30 (ddd,  $J$  = 3.3, 2.3, 1.0 Hz, 1H), 4.81 – 4.70 (m, 1H), 3.68 (d,  $J$  = 0.7 Hz, 3H), 3.50 (s, 1H), 2.63 – 2.51 (m, 1H), 2.42 (ddt,  $J$  = 17.5, 9.1, 3.0 Hz, 1H), 2.25 (ddt,  $J$  = 13.1, 9.0, 7.1 Hz, 1H), 2.02 – 1.88 (m, 1H);  $^{13}\text{C}$  NMR (101 MHz,  $\text{CDCl}_3$ )  $\delta$  151.89, 142.97, 142.00, 134.74, 129.87, 128.56, 127.33, 126.22, 115.02, 114.27, 59.94, 55.89, 31.60, 31.01; HRMS (ESI)  $m/z$   $[\text{M}+\text{H}]^+$ , calc'd for  $\text{C}_{18}\text{H}_{19}\text{NO}$  266.1532; found 266.1500.

**8:** reddish-brown oil, (48.1 mg, 66%). Silica gel column chromatography (10:1 hexane/EtOAc). IR  $\nu_{\text{max}}$  ( $\text{cm}^{-1}$ ) 3400, 2929, 2856, 1508, 1250, 922, 839, 779, 756, 693;  $^1\text{H}$  NMR (400 MHz, Chloroform-*d*)  $\delta$  7.50 – 7.40 (m, 2H), 7.29 – 7.19 (m, 2H), 7.20 – 7.11 (m, 1H), 6.68 – 6.60 (m, 2H), 6.51 – 6.41 (m, 2H), 6.30 (td,  $J$  = 2.7, 1.0 Hz, 1H), 4.72 (dt,  $J$  = 7.1, 2.6 Hz, 1H), 3.41 (s, 1H), 2.66 – 2.49 (m, 1H), 2.47 – 2.35 (m, 1H), 2.24 (ddt,  $J$  = 13.2, 9.0, 7.1 Hz, 1H), 2.00 – 1.89 (m, 1H), 0.91 (s, 9H), 0.10 (s, 6H);  $^{13}\text{C}$  NMR (101 MHz,  $\text{CDCl}_3$ )  $\delta$  147.82, 143.69, 142.89, 135.40, 130.46, 129.17, 127.93, 126.86, 121.28, 114.83, 60.60, 32.23, 31.61, 26.44, 18.84, -3.78; HRMS (ESI)  $m/z$   $[\text{M}+\text{H}]^+$ , calc'd for  $\text{C}_{23}\text{H}_{31}\text{NOSi}$  366.2247; found 366.2208.

**9:** yellow solid, m.p. 97-100 °C, (37.8 mg, 59%). Silica gel column chromatography (20:1 hexane/EtOAc). IR  $\nu_{\text{max}}$  ( $\text{cm}^{-1}$ ) 3403, 3057, 2994, 2851, 1616, 1530, 1326, 1112, 1064, 824, 755;  $^1\text{H}$  NMR (400 MHz, Chloroform-*d*)  $\delta$  7.44 – 7.33 (m, 4H), 7.30 – 7.23 (m, 2H), 7.22 – 7.16 (m, 1H), 6.64 – 6.53 (m, 2H), 6.37 (t,  $J$  = 2.7 Hz, 1H), 4.85 (d,  $J$  = 7.2 Hz, 1H), 4.03 (s, 1H), 2.69 – 2.53 (m, 1H), 2.47 (ddt,  $J$  = 17.6, 8.8, 3.1 Hz, 1H), 2.33 (ddt,  $J$  = 12.9, 8.8, 7.1 Hz, 1H), 1.93 (ddt,  $J$  = 13.7, 8.2, 2.9 Hz, 1H);  $^{13}\text{C}$  NMR (75 MHz,  $\text{CDCl}_3$ )  $\delta$  150.26, 142.48, 134.57, 130.93, 128.98, 127.90, 127.0 (q,  $J$  = 3.7 Hz), 126.42, 125.16 (q,  $J$  = 270.7 Hz), 118.8 (q,  $J$  = 32.4 Hz), 112.41, 59.03, 31.74, 31.34; HRMS (ESI)  $m/z$   $[\text{M}+\text{H}]^+$ , calc'd for  $\text{C}_{18}\text{H}_{16}\text{F}_3\text{N}$  304.1299; found 304.1268.

**10:** white-yellow solid, m.p. 108-109 °C, (25.5 mg, 49%). Silica gel column chromatography (5:1 hexane/ EtOAc). IR  $\nu_{\text{max}}$  ( $\text{cm}^{-1}$ ) 3348, 2983, 2212, 1606, 1519, 1338, 1172, 824, 769;  $^1\text{H}$  NMR (400 MHz, Chloroform-*d*)  $\delta$  7.35 (dq,  $J$  = 8.2, 1.8, 1.1 Hz, 4H), 7.23 (tt,  $J$  = 6.7, 1.3 Hz, 2H), 7.21 – 7.14 (m, 1H), 6.50 (dd,  $J$  = 9.2, 2.2 Hz, 2H), 6.42 – 6.31 (m, 1H), 4.83 (dt,  $J$  = 7.3, 2.5 Hz, 1H), 4.20 (s, 1H), 2.67 – 2.52 (m, 1H), 2.46 (ddt,  $J$  = 17.7, 8.7, 3.1 Hz, 1H), 2.31 (ddt,  $J$  = 13.1, 8.7, 7.1 Hz, 1H), 1.89 (ddt,  $J$  = 13.7, 8.2, 3.0 Hz, 1H);  $^{13}\text{C}$  NMR (101 MHz,  $\text{CDCl}_3$ )  $\delta$  150.54, 141.82, 134.02, 133.78, 130.93, 128.70, 127.70, 126.04, 120.49, 112.54, 98.61, 58.58, 31.37, 31.01; HRMS (ESI)  $m/z$   $[\text{M}+\text{H}]^+$ , calc'd for  $\text{C}_{18}\text{H}_{16}\text{N}_2$  261.1383; found 261.1347.

**11:** yellow oil, (42.1 mg, 68%). Silica gel column chromatography (10:1 hexane/EtOAc). IR  $\nu_{\text{max}}$  ( $\text{cm}^{-1}$ ) 3418, 2949, 1718, 1507, 1456, 1289, 1097, 748, 703;  $^1\text{H}$  NMR (400 MHz, Chloroform-*d*)

$\delta$  7.39 – 7.30 (m, 4H), 7.24 (dddd,  $J$  = 10.0, 5.0, 2.4, 1.2 Hz, 1H), 7.21 – 7.14 (m, 1H), 7.08 – 6.98 (m, 1H), 6.87 (td,  $J$  = 2.6, 1.2 Hz, 1H), 6.77 – 6.66 (m, 2H), 4.61 (d,  $J$  = 7.5 Hz, 1H), 4.09 (s, 1H), 3.69 – 3.57 (m, 3H), 2.58 – 2.42 (m, 1H), 2.42 – 2.21 (m, 2H), 1.89 (dddd,  $J$  = 13.3, 6.9, 3.0, 1.7 Hz, 1H);  $^{13}\text{C}$  NMR (101 MHz,  $\text{CDCl}_3$ )  $\delta$  164.83, 148.12, 144.65, 139.56, 136.59, 130.38, 129.33, 128.81, 128.59, 128.17, 127.12, 117.15, 111.52, 58.77, 51.50, 32.07, 31.21; HRMS (ESI)  $m/z$   $[\text{M}+\text{H}]^+$ , calc'd for  $\text{C}_{19}\text{H}_{19}\text{O}_2$  294.1499; found 294.1449.

**12:** orange-brown oil, (33.6 mg, 65%). Silica gel column chromatography (10:1 hexane/EtOAc). IR  $\nu_{\text{max}}$  ( $\text{cm}^{-1}$ ) 3142, 2961, 1717, 1602, 1504, 1448, 1361, 1291, 1100, 744;  $^1\text{H}$  NMR (400 MHz, Chloroform- $d$ )  $\delta$  7.23 – 7.14 (m, 2H), 7.14 – 7.08 (m, 1H), 6.86 – 6.70 (m, 2H), 4.78 – 4.66 (m, 1H), 4.15 (s, 1H), 3.77 (s, 3H), 2.87 (hept,  $J$  = 6.8 Hz, 1H), 2.76 – 2.62 (m, 1H), 2.62 – 2.47 (m, 1H), 2.41 (dddd,  $J$  = 13.4, 9.1, 7.4, 6.5 Hz, 1H), 2.11 – 1.98 (m, 1H), 1.26 (t,  $J$  = 6.7 Hz, 6H);  $^{13}\text{C}$  NMR (101 MHz,  $\text{CDCl}_3$ )  $\delta$  165.19, 148.32, 144.53, 136.61, 133.12, 126.57, 124.97, 117.66, 111.63, 58.76, 51.62, 32.04, 31.36, 27.12, 22.52, 22.16; HRMS (ESI)  $m/z$   $[\text{M}+\text{H}]^+$ , calc'd for  $\text{C}_{16}\text{H}_{21}\text{O}_2$  260.1643; found 260.1606.

**13:** white-yellow solid, m.p. 80-83 °C, (34.9 mg, 72%). Silica gel column chromatography (2:1 hexane/EtOAc). IR  $\nu_{\text{max}}$  ( $\text{cm}^{-1}$ ) 3356, 2949, 2211, 1714, 1606, 1523, 1296, 1173, 1098, 825;  $^1\text{H}$  NMR (400 MHz, Chloroform- $d$ )  $\delta$  7.49 – 7.38 (m, 2H), 7.06 (td,  $J$  = 2.6, 1.0 Hz, 1H), 6.69 – 6.60 (m, 2H), 4.93 (s, 1H), 4.74 (dtd,  $J$  = 7.6, 2.6, 1.3 Hz, 1H), 3.73 (d,  $J$  = 0.7 Hz, 3H), 2.77 – 2.63 (m, 1H), 2.61 – 2.48 (m, 1H), 2.38 (dddd,  $J$  = 13.6, 9.1, 7.6, 6.5 Hz, 1H), 2.02 – 1.90 (m, 1H);  $^{13}\text{C}$  NMR (101 MHz,  $\text{CDCl}_3$ )  $\delta$  164.61, 150.60, 148.49, 135.86, 133.63, 120.44, 112.94, 98.97, 57.80, 51.76, 31.59, 31.23; HRMS (ESI)  $m/z$   $[\text{M}+\text{H}]^+$ , calc'd for  $\text{C}_{14}\text{H}_{14}\text{N}_2\text{O}_2$  243.1117; found 243.1089.

**14:** pale-yellow solid, m.p. 103-105 °C, (41.8 mg, 70%). Silica gel column chromatography (10:1 hexane/EtOAc). IR  $\nu_{\text{max}}$  ( $\text{cm}^{-1}$ ) 3386, 2954, 1710, 1616, 1533, 1328, 1298, 1105, 1063, 826;  $^1\text{H}$  NMR (400 MHz, Chloroform- $d$ )  $\delta$  7.45 – 7.36 (m, 2H), 7.05 (td,  $J$  = 2.4, 1.1 Hz, 1H), 6.69 – 6.60 (m, 2H), 4.77 – 4.70 (m, 1H), 4.26 (s, 1H), 3.74 (d,  $J$  = 0.8 Hz, 3H), 2.75 – 2.60 (m, 1H), 2.59 – 2.45 (m, 1H), 2.45 – 2.31 (m, 1H), 2.02 – 1.90 (m, 1H);  $^{13}\text{C}$  NMR (75 MHz,  $\text{CDCl}_3$ )  $\delta$  165.12, 150.33, 148.63, 136.51, 126.85 (q,  $J$  = 3.9 Hz), 125.31 (q,  $J$  = 269.4 Hz), 119.28 (q,  $J$  = 32.5 Hz), 112.96, 58.40, 52.04, 31.93, 31.57; HRMS (ESI)  $m/z$   $[\text{M}+\text{H}]^+$ , calc'd for  $\text{C}_{14}\text{H}_{14}\text{F}_3\text{NO}_2$  286.1044; found 286.1010.

**15:** yellow solid, m.p. 104-106 °C, (30 mg, 45%). Silica gel column chromatography (100:1 hexane/EtOAc). IR  $\nu_{\text{max}}$  ( $\text{cm}^{-1}$ ) 3418, 3055, 2926, 1506, 1488, 1436, 1310, 771, 747, 703;  $^1\text{H}$  NMR (300 MHz, Chloroform- $d$ )  $\delta$  7.36 – 7.27 (m, 6H), 7.19 (dd,  $J$  = 5.1, 1.3 Hz, 1H), 7.13 (dt,  $J$  = 7.5, 1.7 Hz, 1H), 7.06 (dd,  $J$  = 3.8, 1.4 Hz, 1H), 6.97 (ddd,  $J$  = 5.1, 3.5, 1.4 Hz, 1H), 6.89 (d,  $J$  = 8.2 Hz, 1H), 6.82 (tt,  $J$  = 7.4, 1.4 Hz, 1H), 6.15 (hept,  $J$  = 1.2 Hz, 1H), 4.94 – 4.82 (m, 1H), 4.16 (s, 1H), 2.66 – 2.32 (m, 3H), 2.04 – 1.88 (m, 1H);  $^{13}\text{C}$  NMR (75 MHz,  $\text{CDCl}_3$ )  $\delta$  144.66, 139.61, 139.14, 137.51, 130.85, 129.64, 129.56, 129.10, 129.00, 128.25, 127.55, 127.37, 124.64 (two carbons overlap, see HMQC), 117.21, 111.40, 61.22, 32.19, 31.27; HRMS (ESI)  $m/z$   $[\text{M}+\text{H}]^+$ , calc'd for  $\text{C}_{21}\text{H}_{19}\text{NS}$  318.1313; found 318.1272.

**16:** white-yellow solid, m.p. 104-106 °C, (27.2 mg, 41%). Silica gel column chromatography (100:1 hexane/EtOAc). IR  $\nu_{\text{max}}$  ( $\text{cm}^{-1}$ ) 3418, 3055, 2926, 1506, 1488, 1436, 1310, 771, 747, 703;

<sup>1</sup>H NMR (400 MHz, Chloroform-*d*) δ 7.32 – 7.08 (m, 9H), 7.03 (dq, *J* = 7.3, 1.9 Hz, 1H), 6.84 – 6.65 (m, 2H), 6.04 (tt, *J* = 2.5, 1.1 Hz, 1H), 4.80 – 4.73 (m, 1H), 3.99 (s, 1H), 2.53 – 2.19 (m, 3H), 1.93 – 1.76 (m, 1H); <sup>13</sup>C NMR (101 MHz, CDCl<sub>3</sub>) δ 144.52, 139.33, 138.37, 136.60, 130.54, 129.21, 129.14, 128.77, 128.72, 127.82, 127.02, 126.24, 125.48, 121.12, 116.76, 110.95, 60.49, 31.84, 30.84; HRMS (ESI) *m/z* [M+H]<sup>+</sup>, calc'd for C<sub>21</sub>H<sub>19</sub>NS 318.1305; found 318.1272.

**17:** yellow-brown solid, m.p. 113-117 °C, (41.7 mg, 64%). Silica gel column chromatography (25:1 hexane/EtOAc). IR ν<sub>max</sub> (cm<sup>-1</sup>) 3416, 3030, 2928, 2848, 1580, 1507, 1436, 1309, 748, 704; <sup>1</sup>H NMR (300 MHz, Chloroform-*d*) δ 8.74 (s, 1H), 8.50 (d, *J* = 4.8 Hz, 1H), 7.71 (dt, *J* = 7.8, 1.9 Hz, 1H), 7.35 – 7.21 (m, 7H), 7.11 (dd, *J* = 7.4, 1.7 Hz, 1H), 6.95 – 6.76 (m, 2H), 6.39 (dt, *J* = 2.6, 1.5 Hz, 1H), 4.98 (d, *J* = 6.2 Hz, 1H), 3.94 (s, 1H), 2.72 – 2.38 (m, 3H), 2.10 – 1.91 (m, 1H); <sup>13</sup>C NMR (101 MHz, CDCl<sub>3</sub>) δ 148.23, 147.83, 144.09, 140.05, 139.16, 133.39, 131.77, 130.54, 130.52, 129.14, 128.73, 127.99, 127.08, 123.21, 117.10, 111.03, 59.33, 31.61, 31.20, 31.13; HRMS (ESI) *m/z* [M+H]<sup>+</sup>, calc'd for C<sub>22</sub>H<sub>20</sub>N<sub>2</sub> 313.1705; found 313.1660.

**18:** yellow-brown solid, m.p. 115-118 °C, (25.9 mg, 42%). Silica gel column chromatography (5:1 hexane/EtOAc). IR ν<sub>max</sub> (cm<sup>-1</sup>) 3279, 2934, 1614, 1534, 1326, 1112, 1063, 822, 775; <sup>1</sup>H NMR (400 MHz, Chloroform-*d*) δ 8.47 (ddd, *J* = 4.8, 1.8, 0.9 Hz, 1H), 7.52 (td, *J* = 7.7, 1.9 Hz, 1H), 7.39 – 7.28 (m, 2H), 7.28 – 7.22 (m, 1H), 7.05 (ddd, *J* = 7.6, 4.8, 1.2 Hz, 1H), 6.84 – 6.74 (m, 1H), 6.65 – 6.53 (m, 2H), 4.88 (d, *J* = 7.2 Hz, 1H), 4.38 (s, 1H), 2.72 – 2.55 (m, 1H), 2.55 – 2.44 (m, 1H), 2.35 (ddt, *J* = 13.2, 9.0, 7.1 Hz, 1H), 2.02 – 1.92 (m, 1H); <sup>13</sup>C NMR (75 MHz, CDCl<sub>3</sub>) δ 153.62, 150.51, 149.83, 142.96, 136.93, 136.07, 126.9 (q, *J* = 3.8 Hz), 125.3 (q, *J* = 270.5 Hz), 122.50, 121.27, 118.9 (q, *J* = 32.5 Hz), 112.77, 58.98, 31.90, 31.46; HRMS (ESI) *m/z* [M+H]<sup>+</sup>, calc'd for C<sub>17</sub>H<sub>15</sub>F<sub>3</sub>N<sub>2</sub> 305.1253; found 305.1221.

**21:** white/pale yellow solid, m.p. 78-80 °C, (32.7 mg, 52%). Silica gel column chromatography (100:1 hexane/EtOAc). IR ν<sub>max</sub> (cm<sup>-1</sup>) 3402, 3059, 2929, 2846, 1592, 1495, 1317, 1019, 741, 691; <sup>1</sup>H NMR (400 MHz, Chloroform-*d*) δ 7.45 – 7.38 (m, 2H), 7.33 (dd, *J* = 7.9, 1.5 Hz, 1H), 7.22 (tt, *J* = 6.8, 0.9 Hz, 2H), 7.19 – 7.11 (m, 2H), 6.73 (ddd, *J* = 8.1, 1.5, 0.6 Hz, 1H), 6.50 (ddd, *J* = 7.8, 7.3, 1.5 Hz, 1H), 6.36 (ddd, *J* = 3.2, 2.4, 1.0 Hz, 1H), 4.80 (d, *J* = 7.0 Hz, 1H), 4.36 (s, 1H), 2.70 – 2.54 (m, 1H), 2.50 – 2.38 (m, 1H), 2.28 (ddt, *J* = 13.1, 8.9, 7.1 Hz, 1H), 1.92 (tdd, *J* = 10.7, 5.4, 2.8 Hz, 1H); <sup>13</sup>C NMR (101 MHz, CDCl<sub>3</sub>) δ 144.48, 142.36, 134.48, 132.60, 130.57, 128.57, 128.49, 127.47, 126.13, 117.54, 111.88, 110.03, 59.45, 31.74, 31.02; HRMS (ESI) *m/z* [M+H]<sup>+</sup>, calc'd for C<sub>17</sub>H<sub>16</sub>BrN 314.0539, 316.0520; found 314.0500, 316.0479.

**23:** red-brown solid, m.p. 61-64 °C, (13.1 mg, 56%). Silica gel column chromatography (10:1 hexane/EtOAc). IR ν<sub>max</sub> (cm<sup>-1</sup>) 3392, 3050, 2949, 16030, 1483, 740, 699, 432; <sup>1</sup>H NMR (300 MHz, Chloroform-*d*) δ 7.42 – 7.28 (m, 4H), 7.26 – 7.15 (m, 1H), 7.04 (td, *J* = 7.6, 1.3 Hz, 1H), 6.92 (ddd, *J* = 7.4, 1.3, 0.6 Hz, 1H), 6.77 – 6.60 (m, 2H), 4.38 – 4.28 (m, 1H), 2.49 – 2.30 (m, 2H), 2.03 (ddt, *J* = 13.0, 11.8, 6.4 Hz, 1H), 1.94 – 1.74 (m, 2H), 1.74 – 1.57 (m, 1H); <sup>13</sup>C NMR (75 MHz, CDCl<sub>3</sub>) δ 150.83, 148.36, 135.95, 128.32, 127.61, 126.31, 125.94, 124.60, 118.64, 108.79, 71.95, 62.49, 40.77, 38.09, 25.45; HRMS (ESI) *m/z* [M+H]<sup>+</sup>, calc'd for C<sub>17</sub>H<sub>17</sub>N 314.0539, 236.1426; found 236.1395.



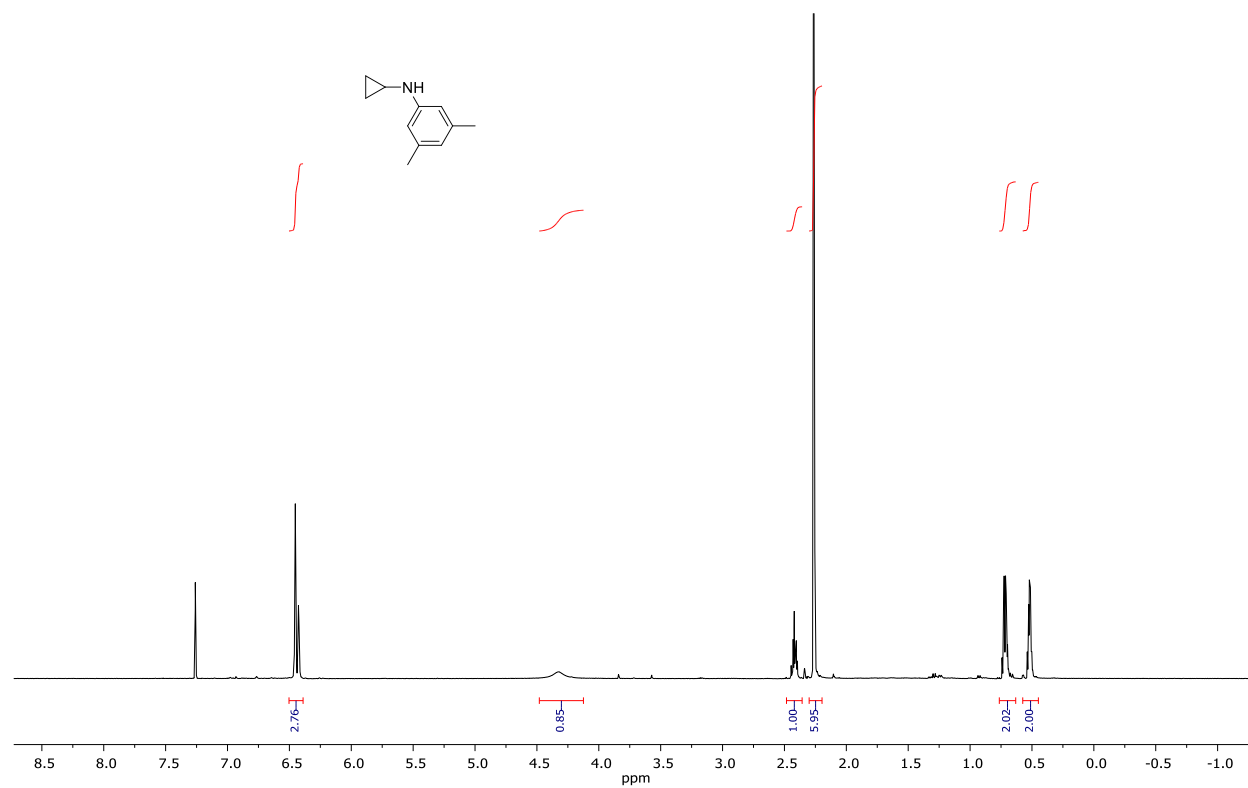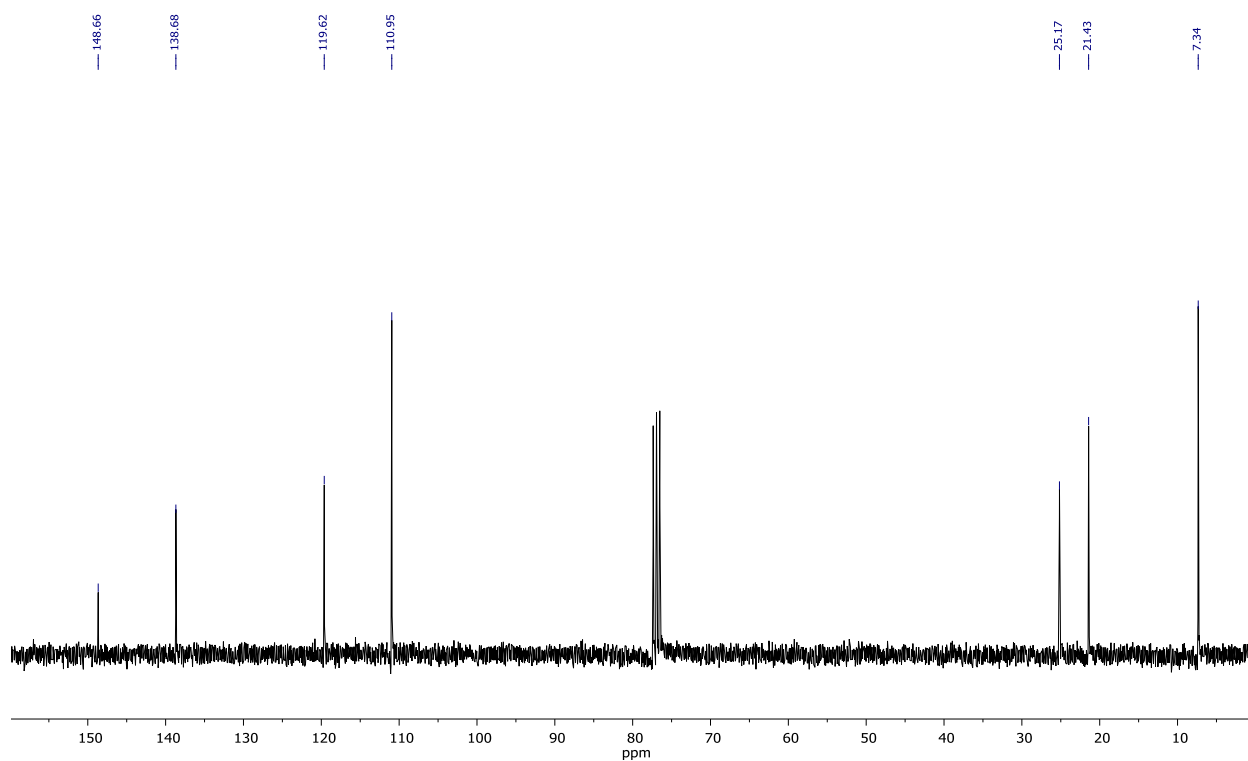

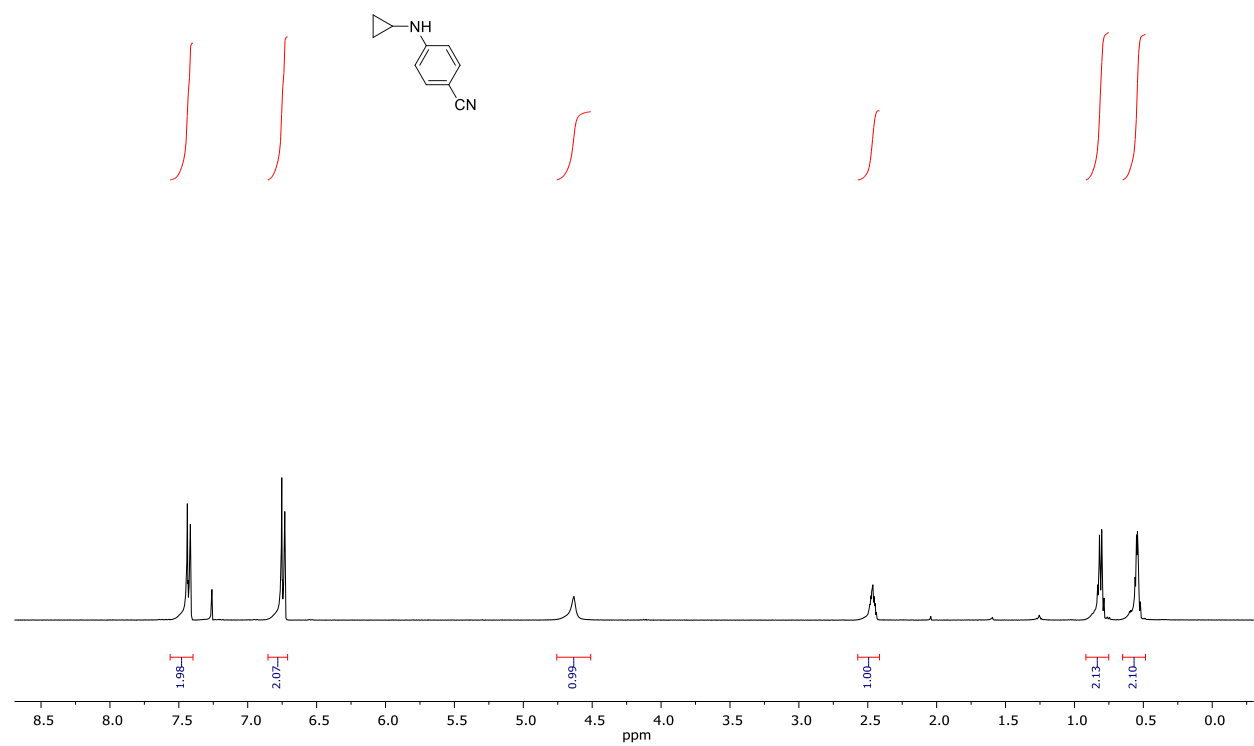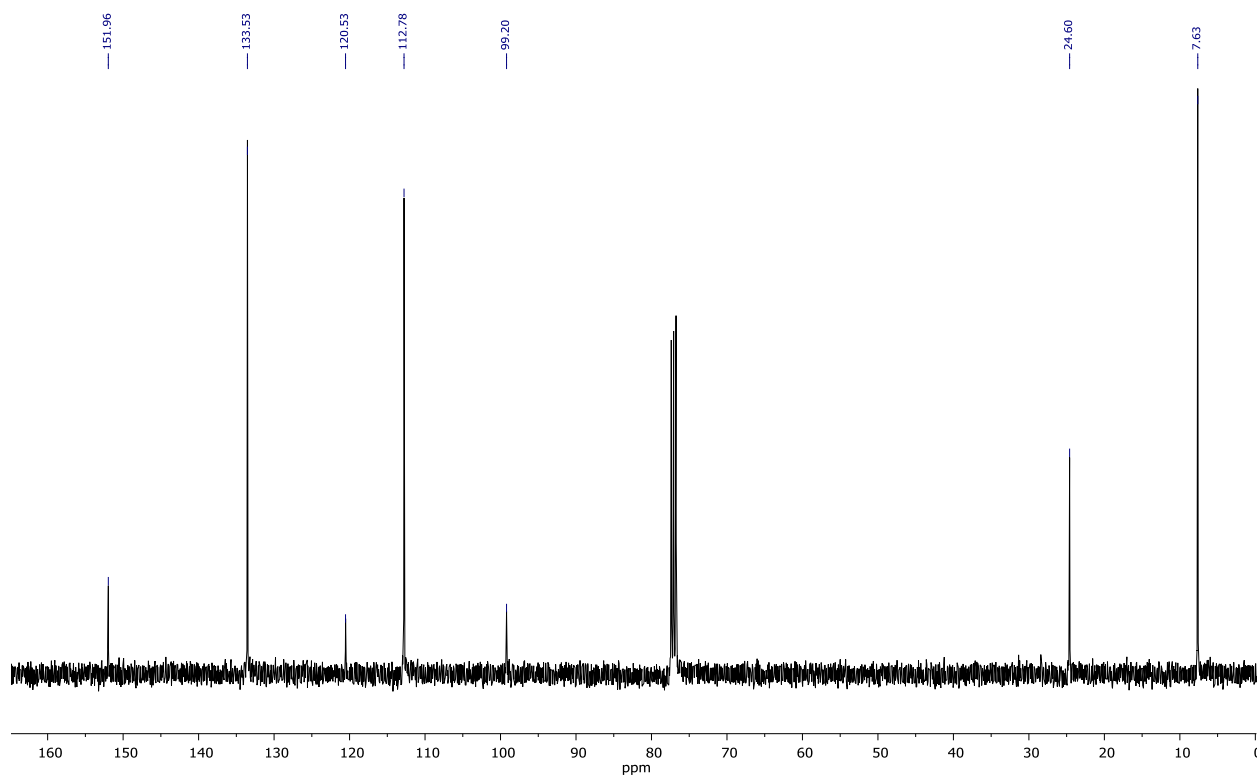

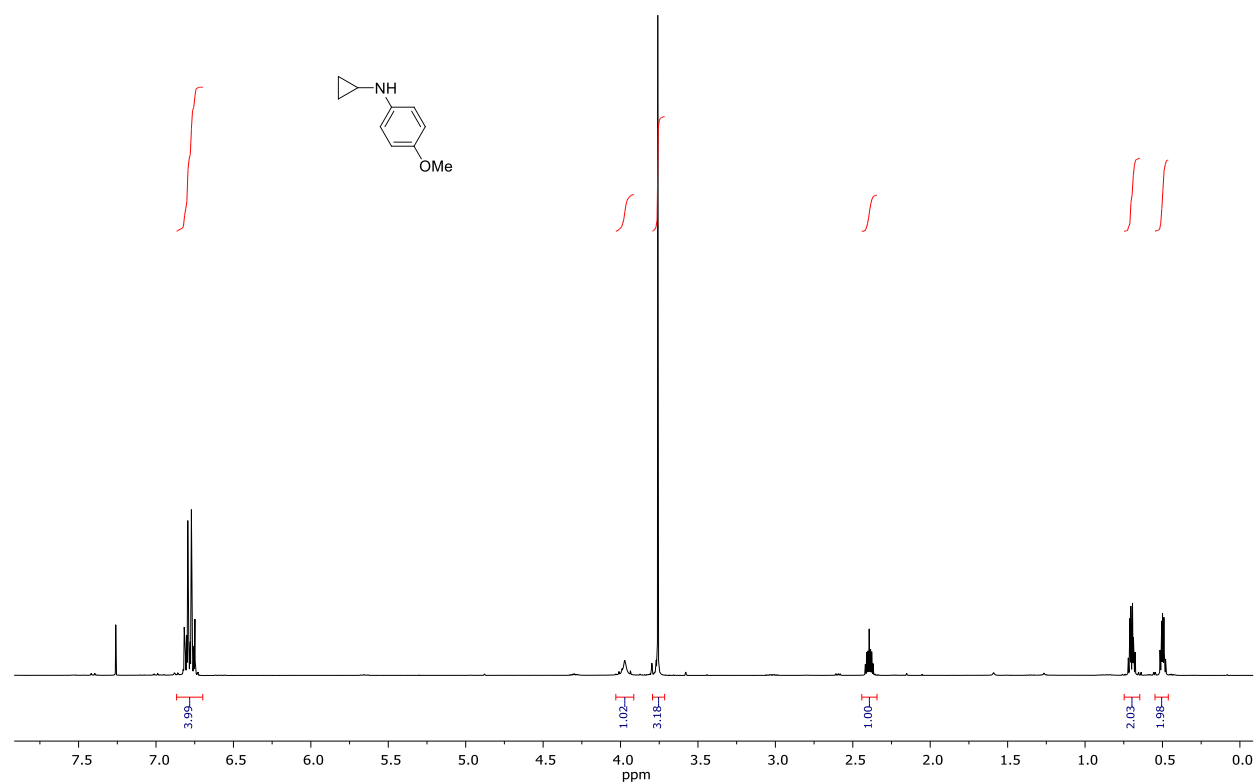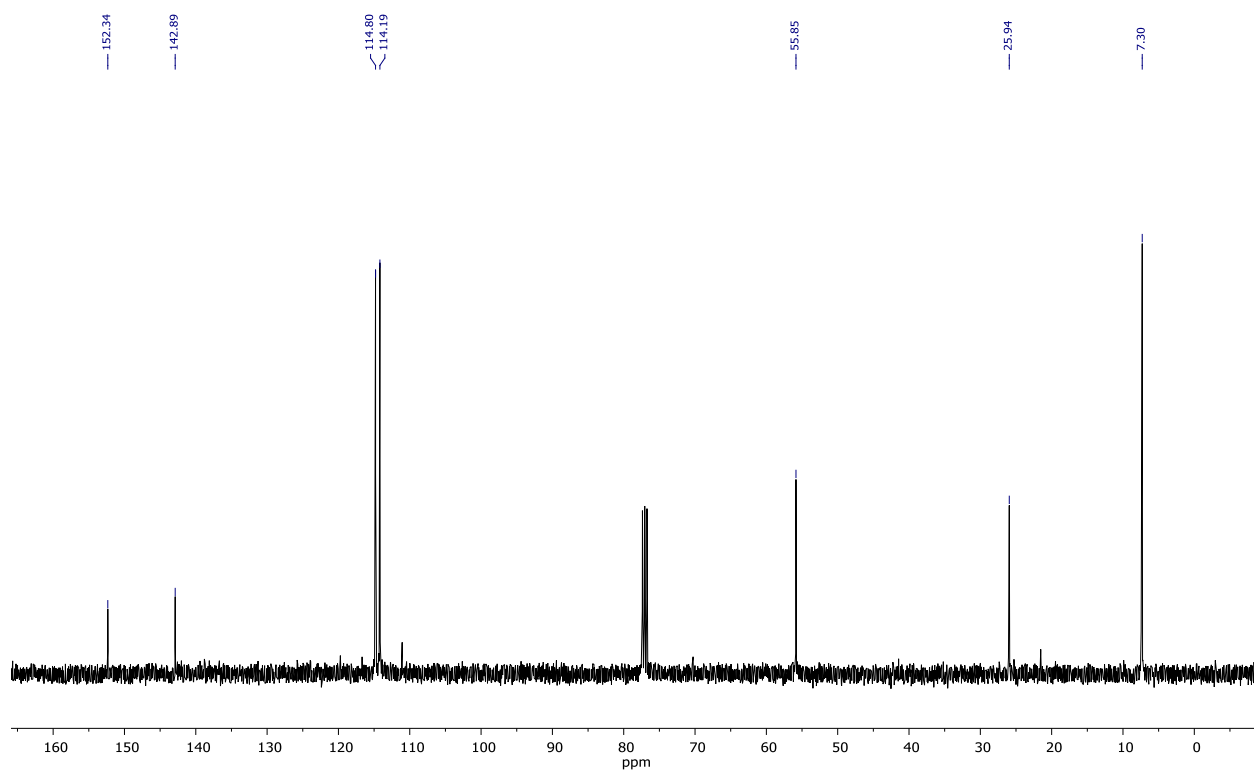

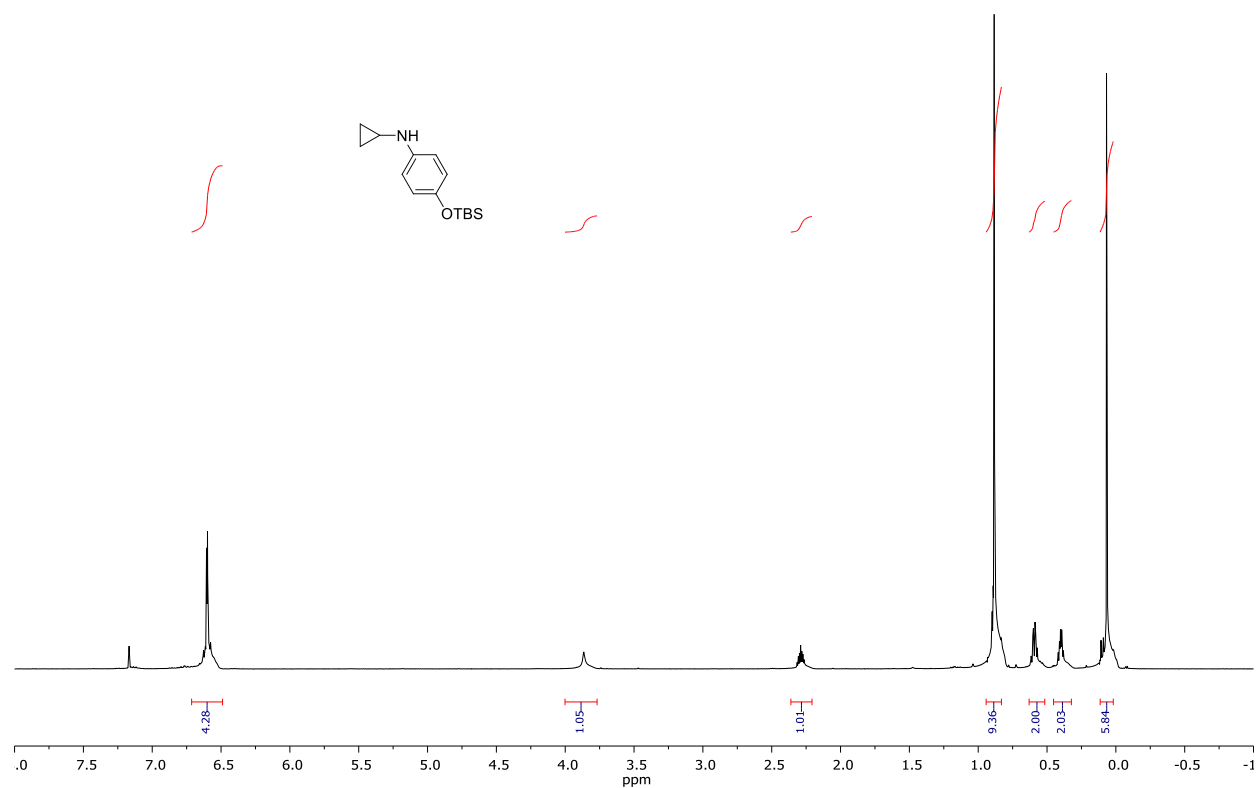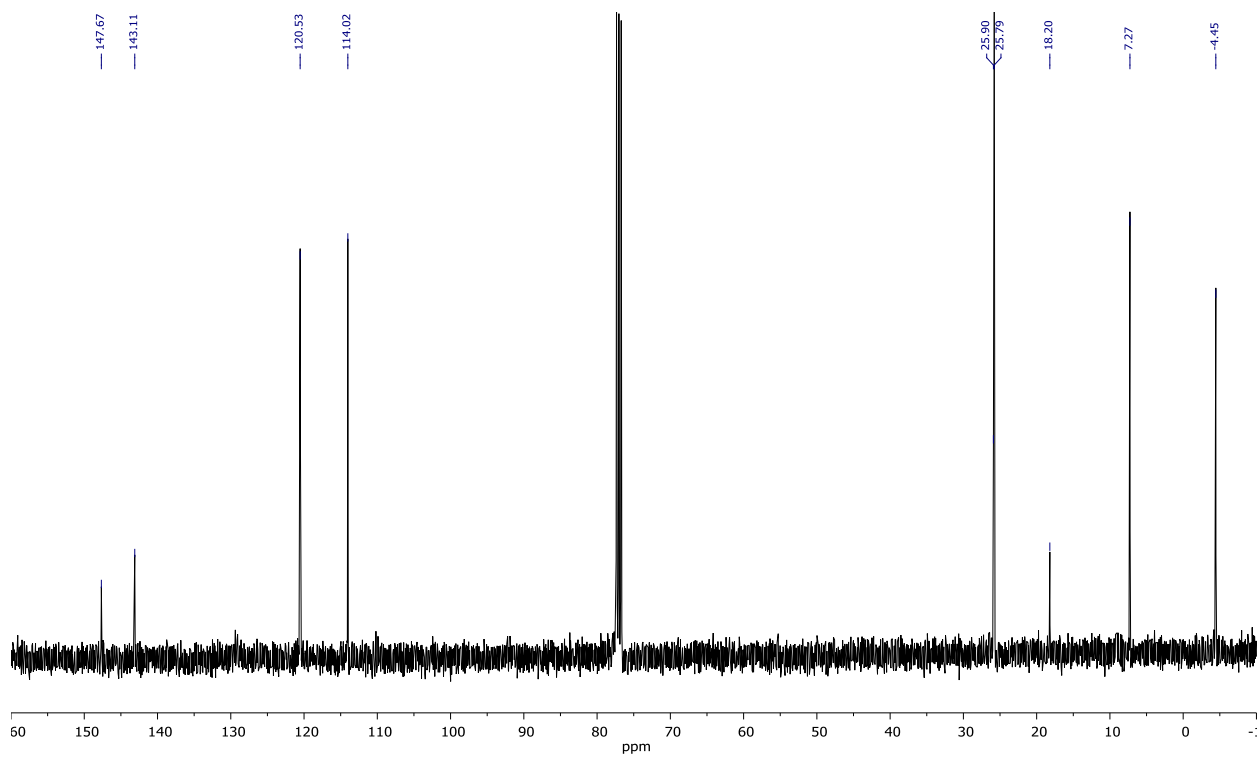

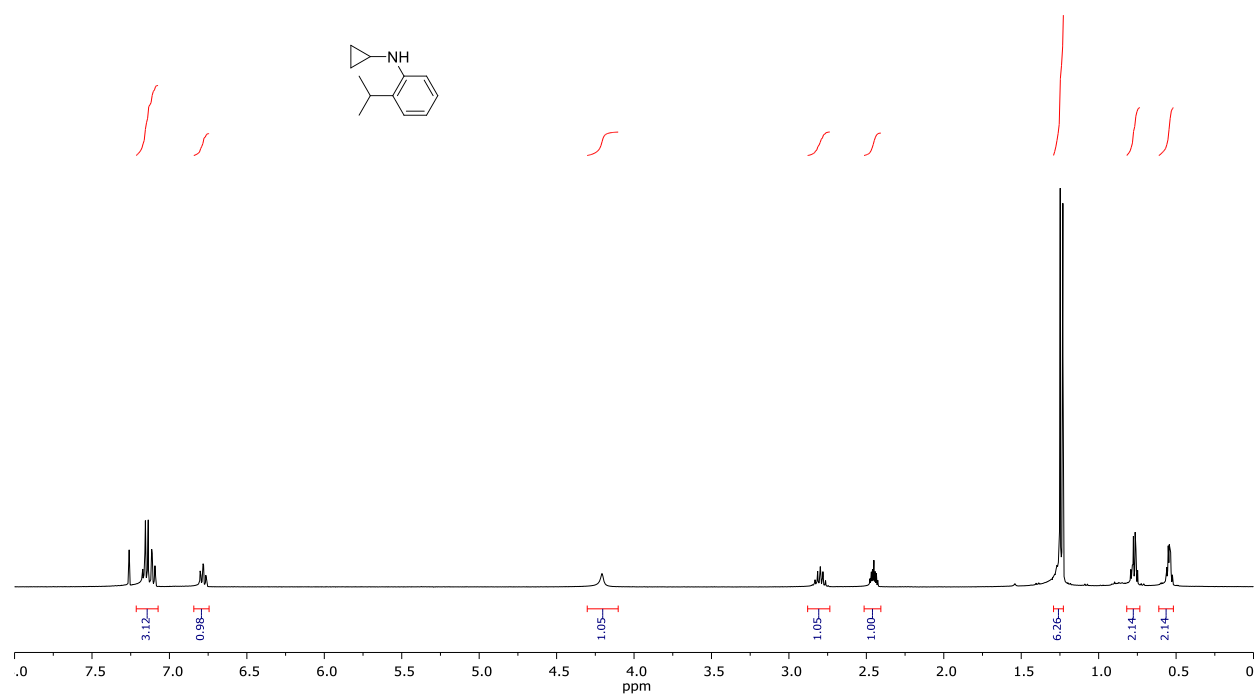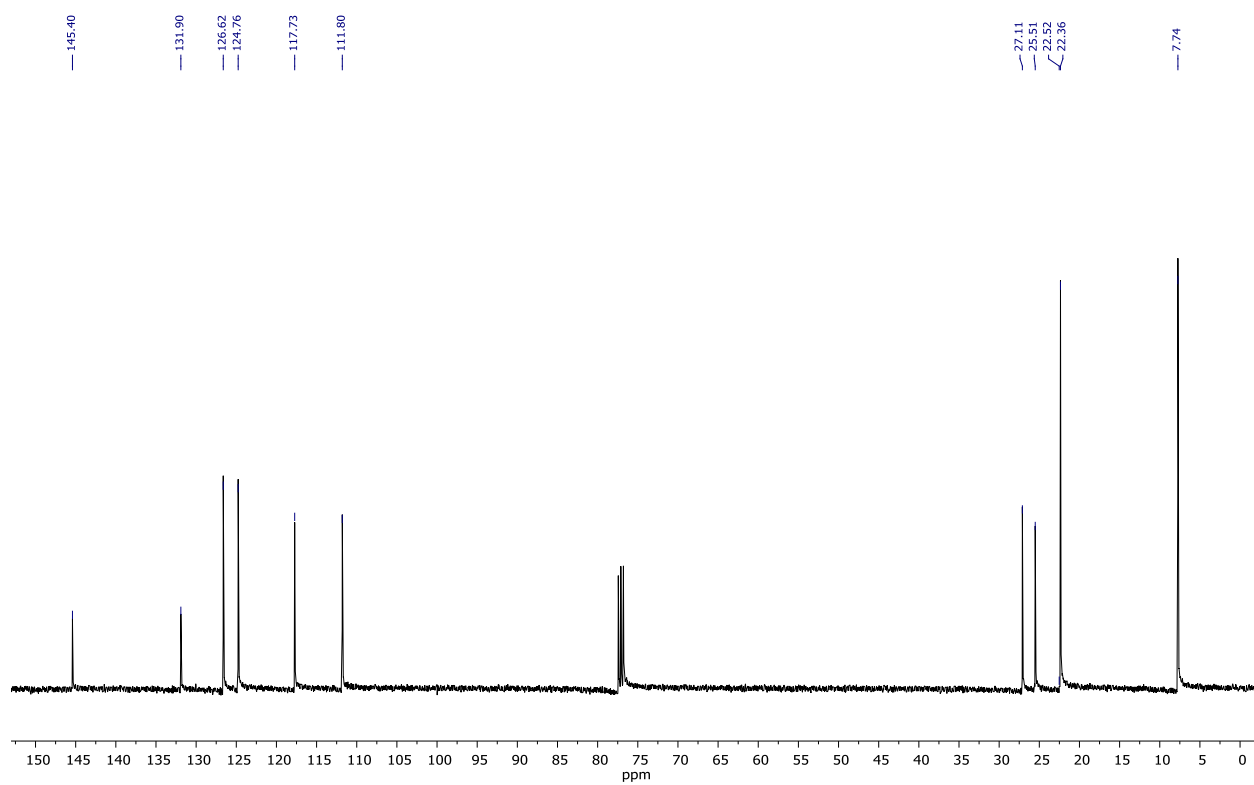

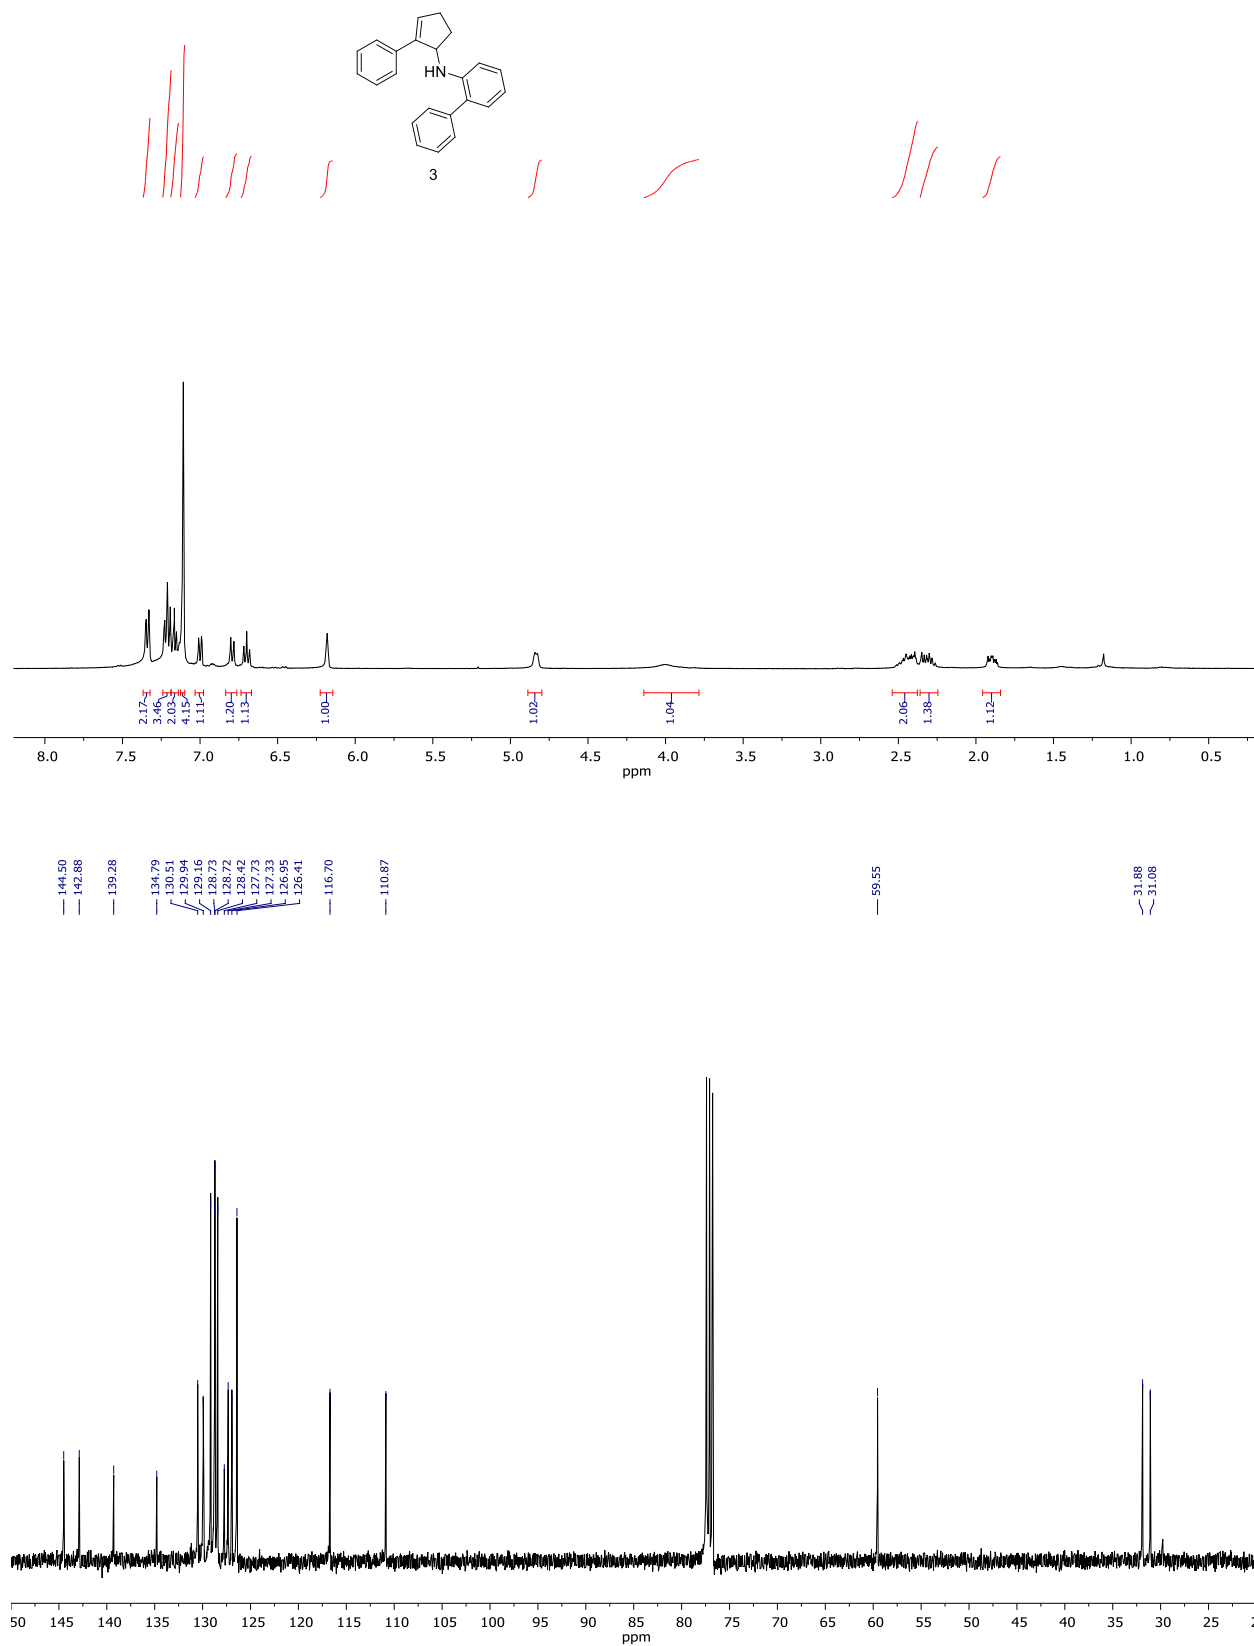

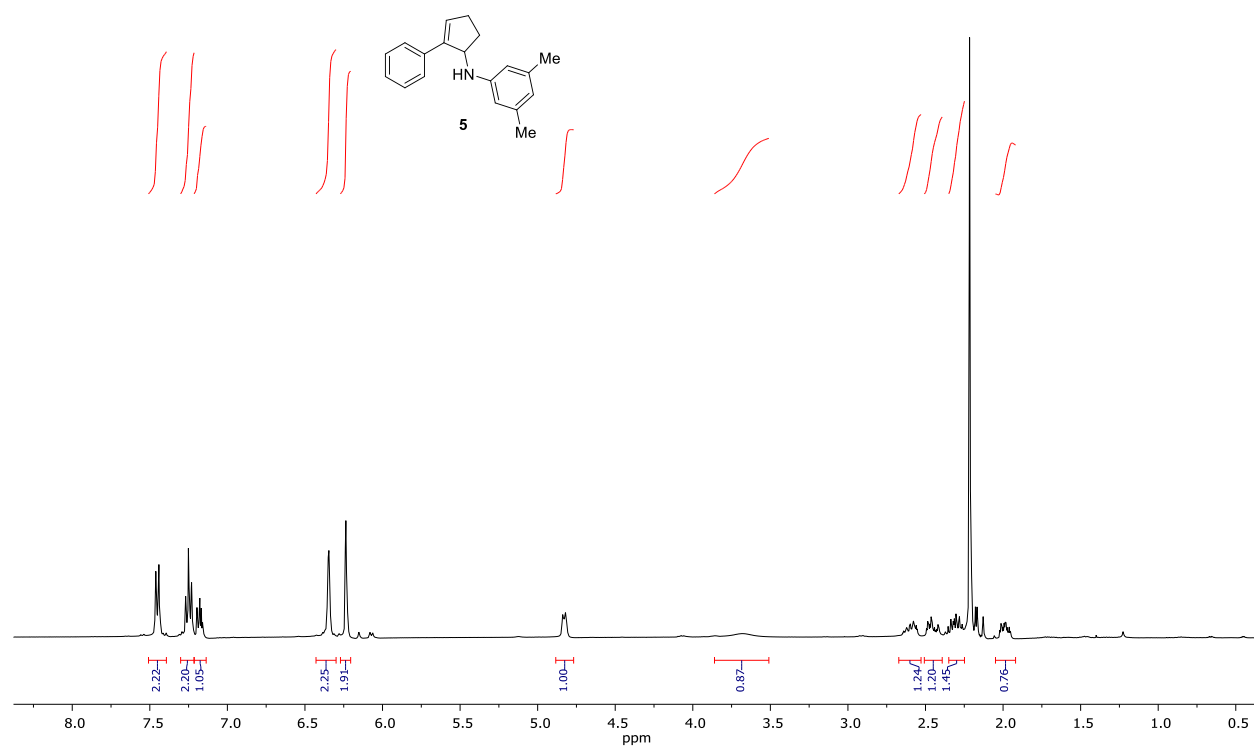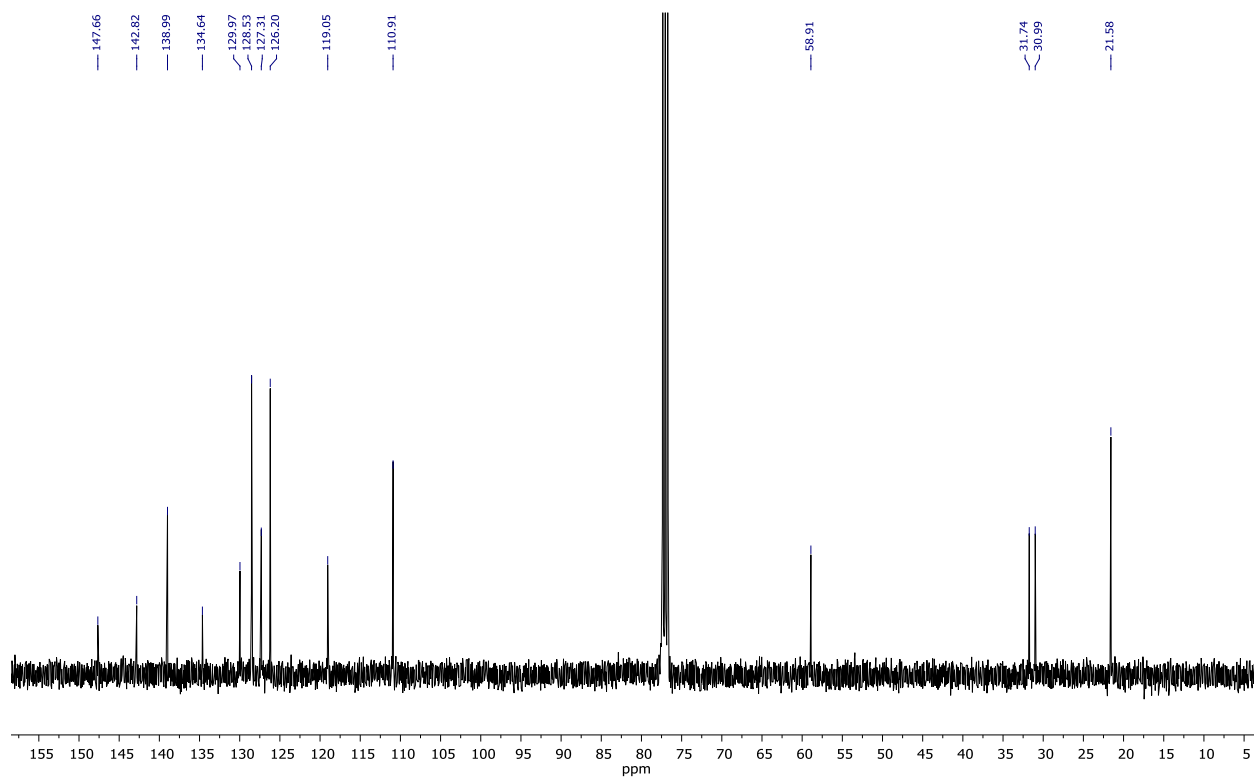

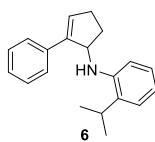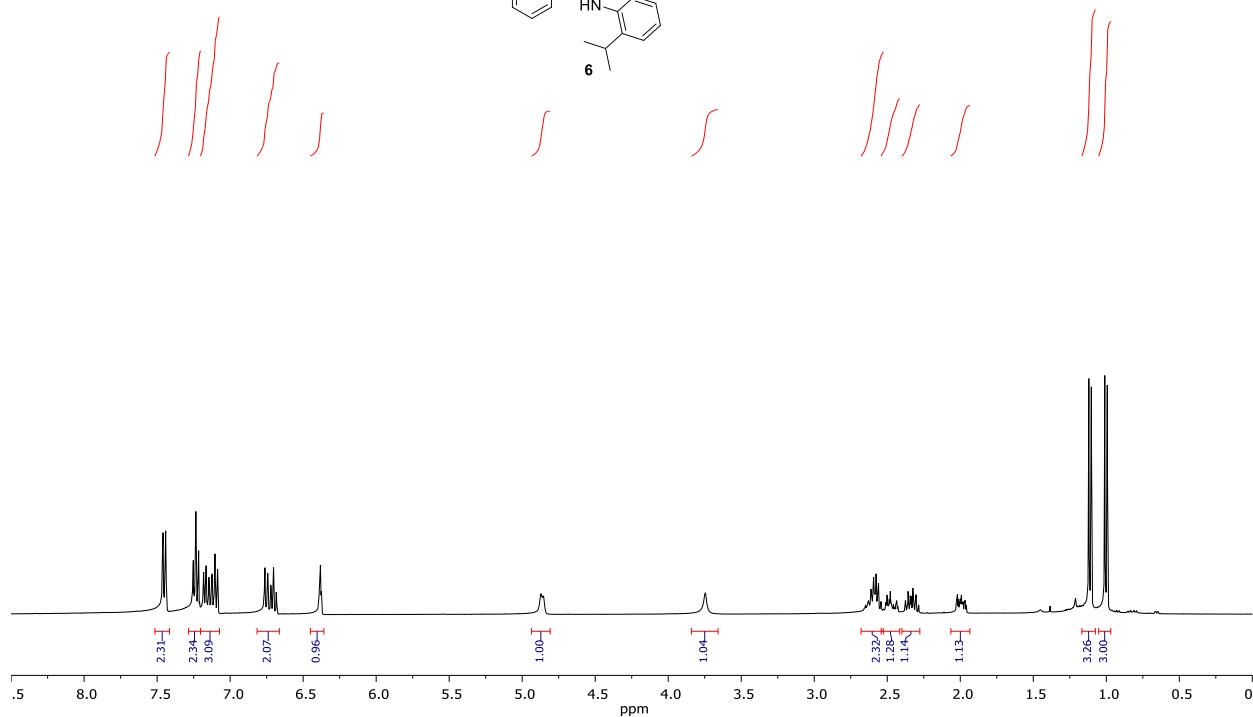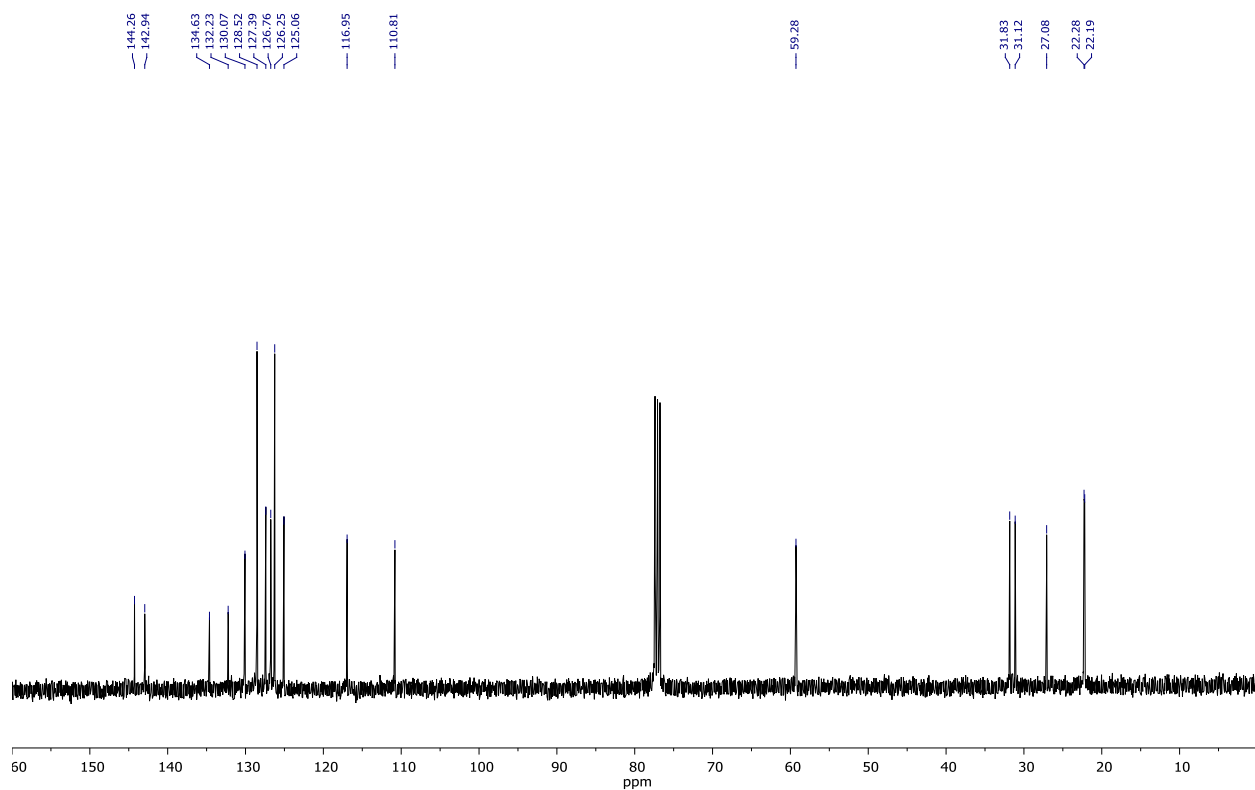



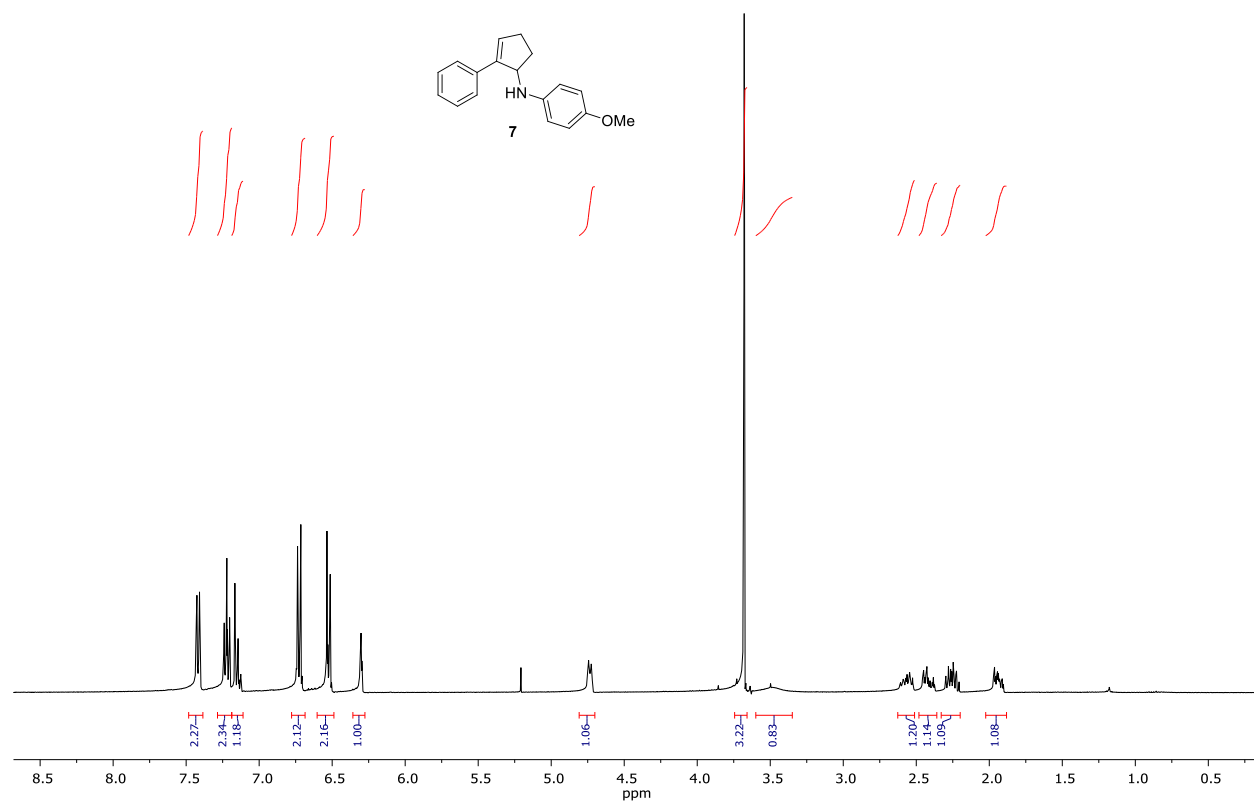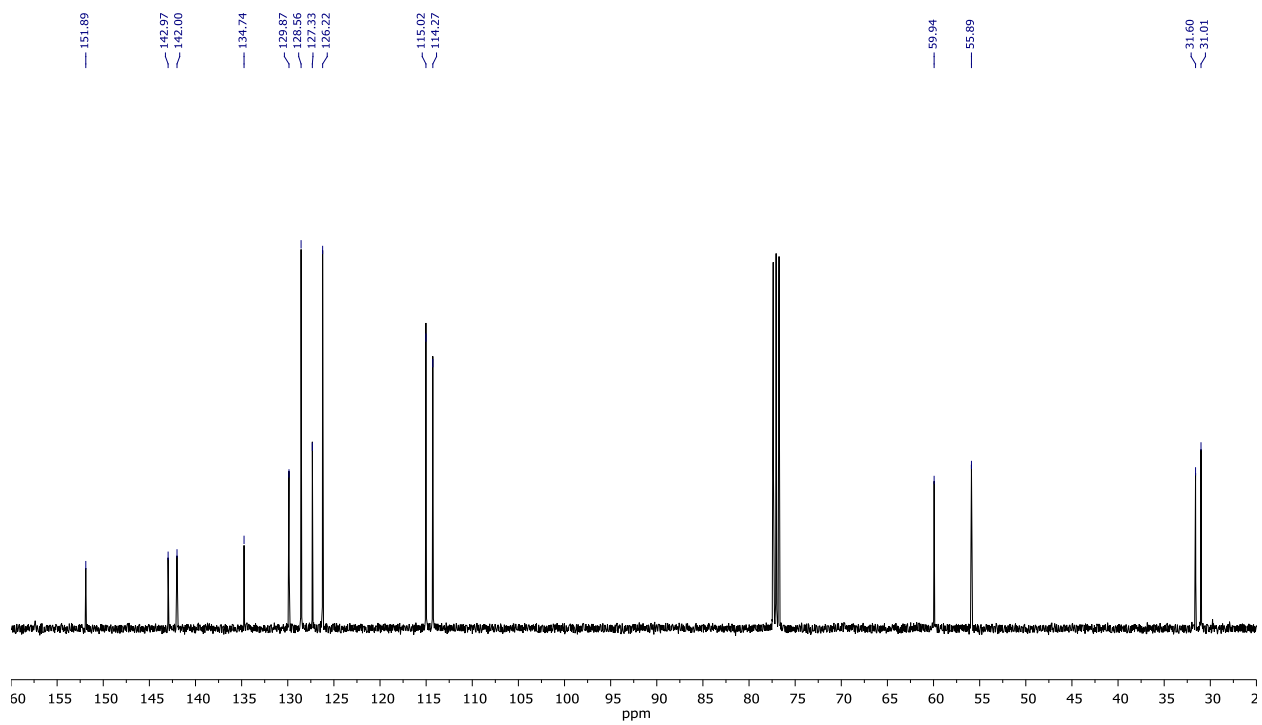

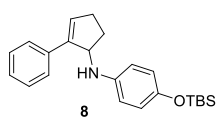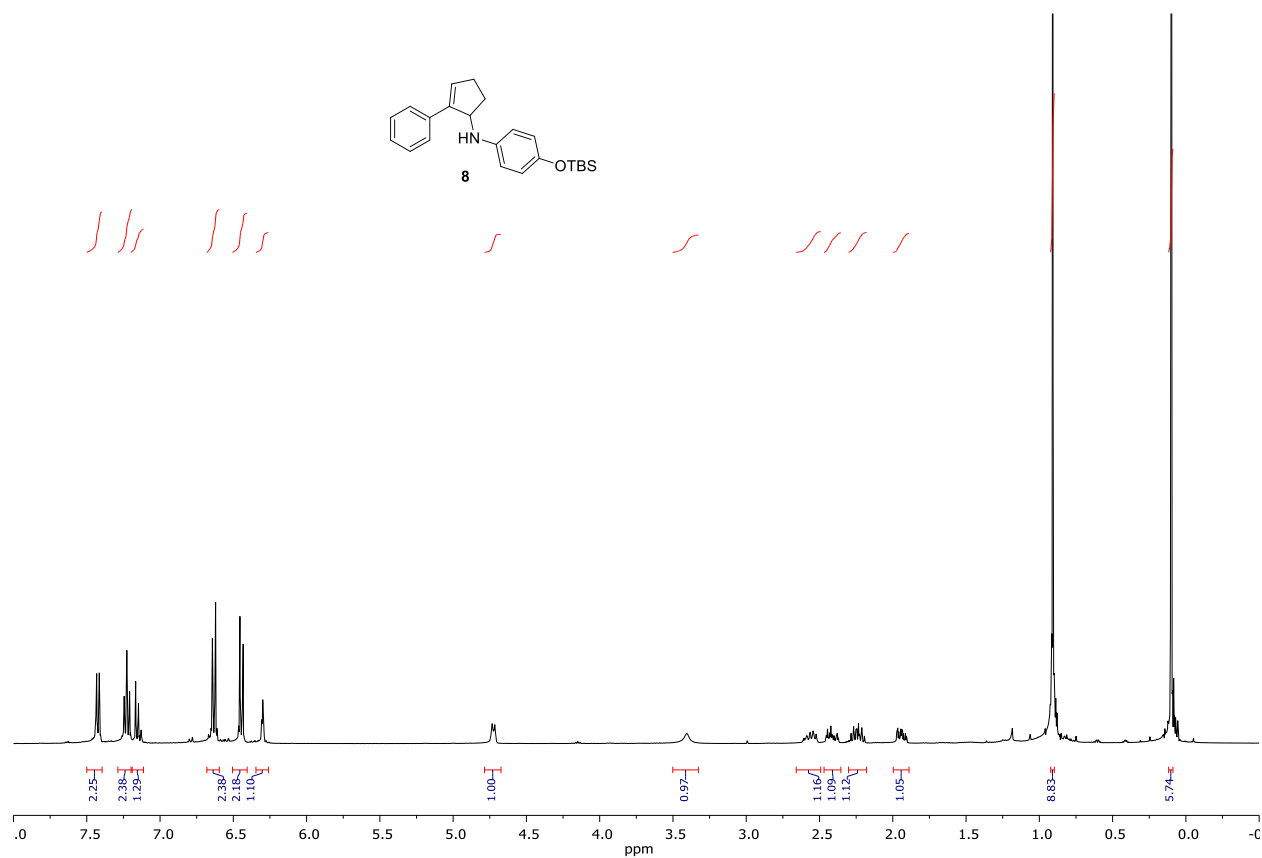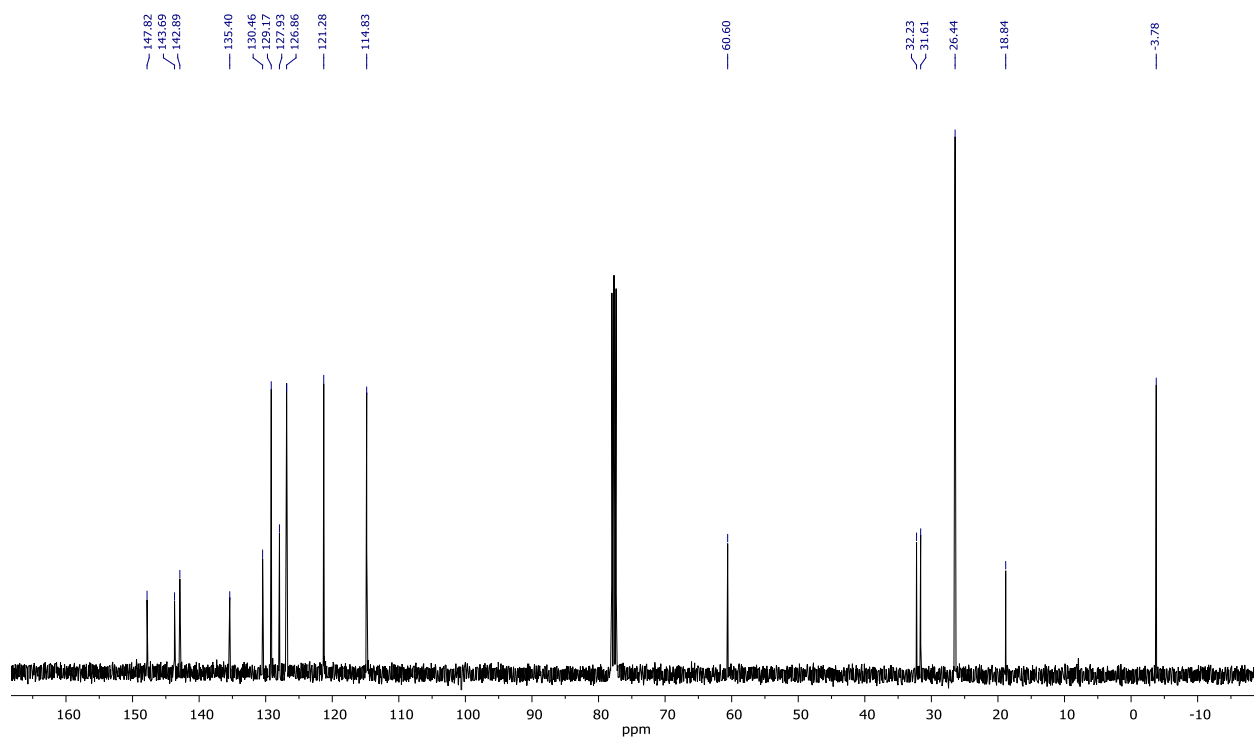

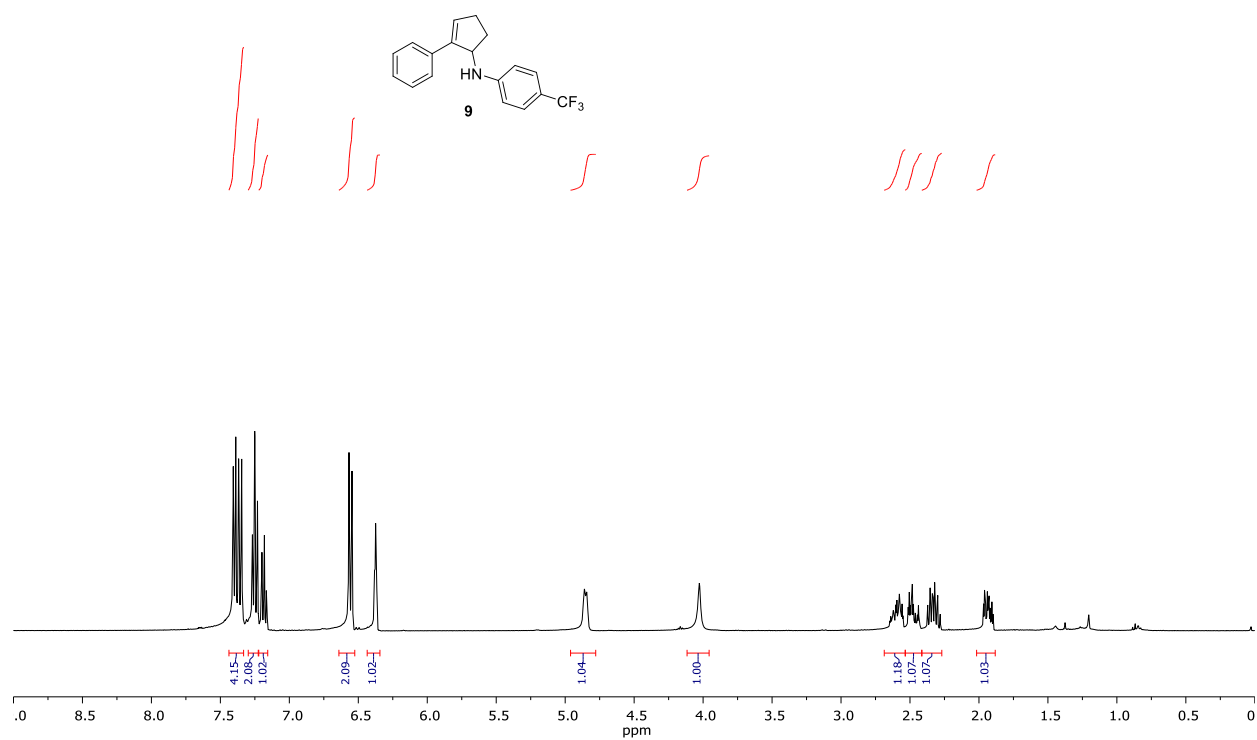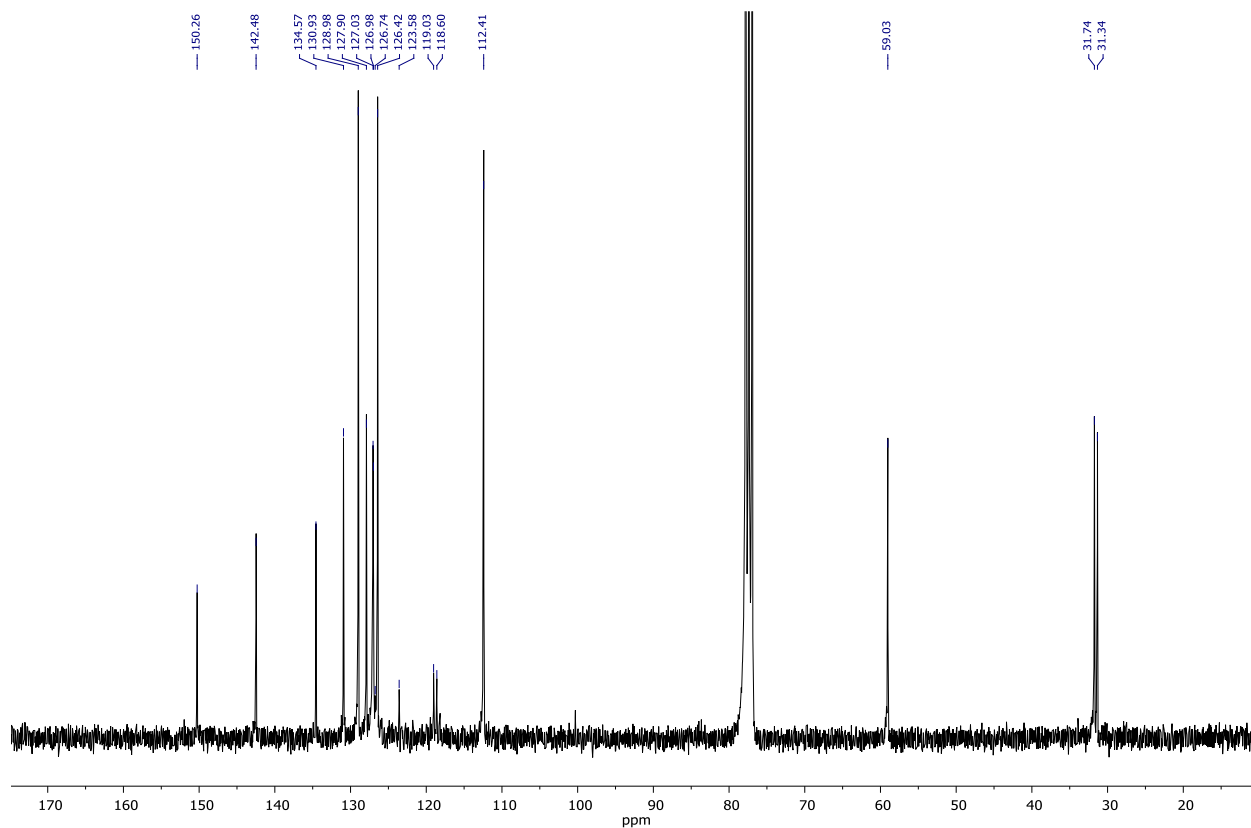

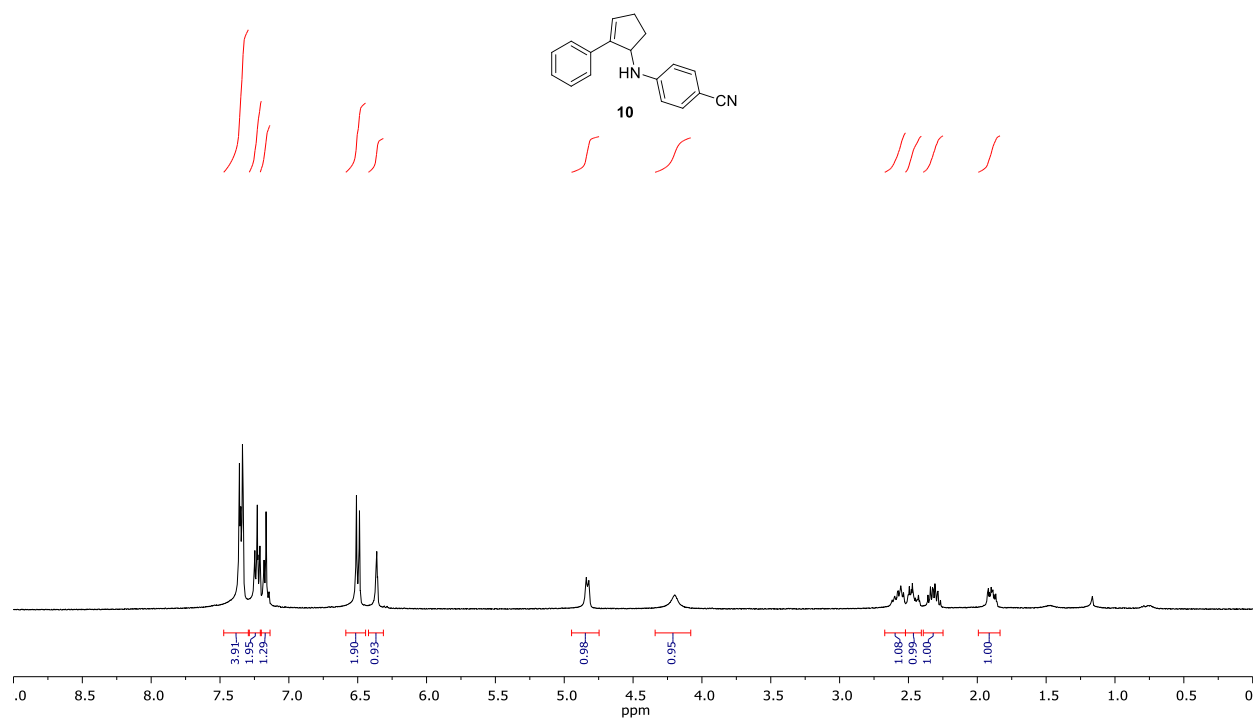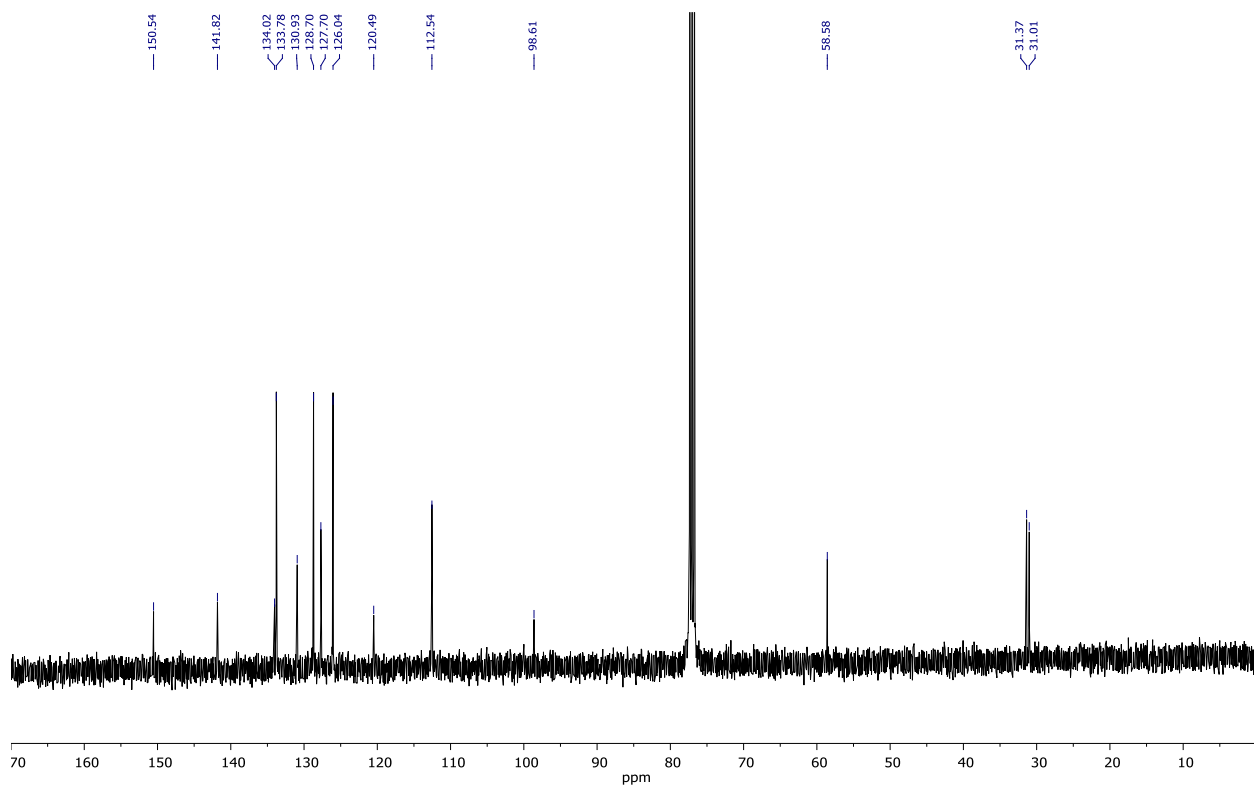

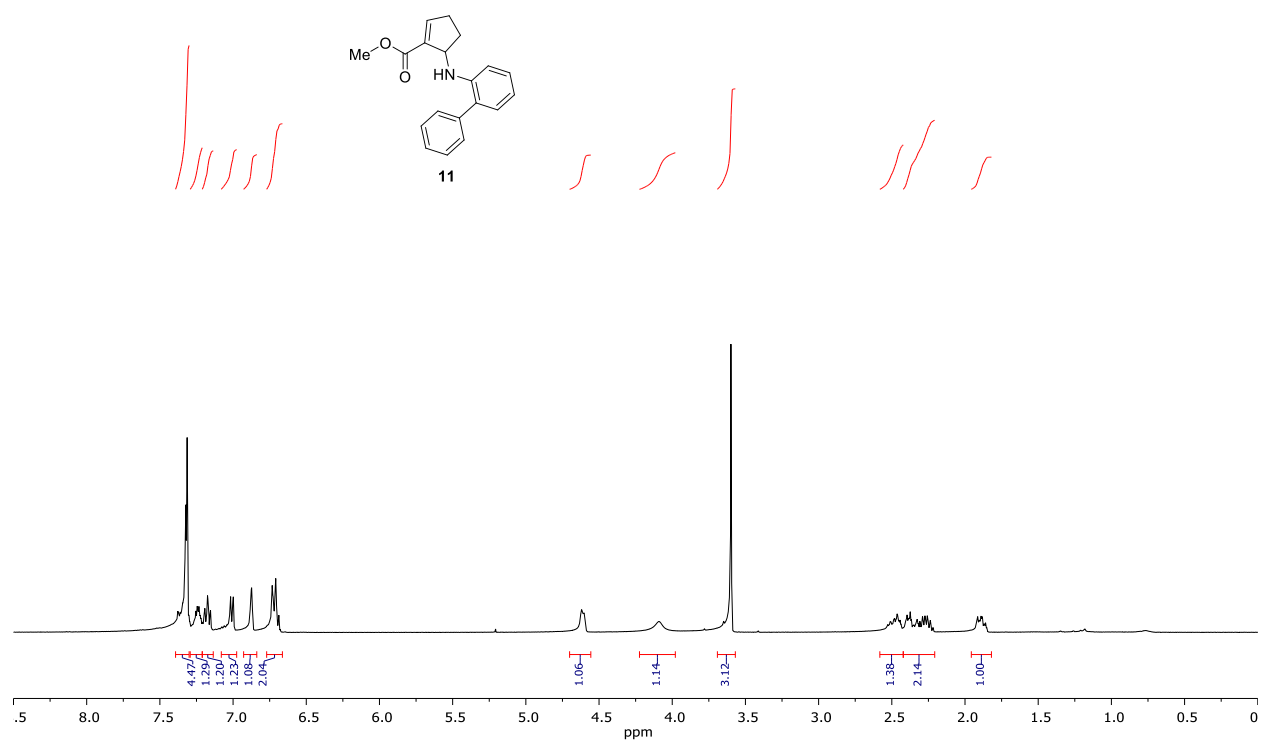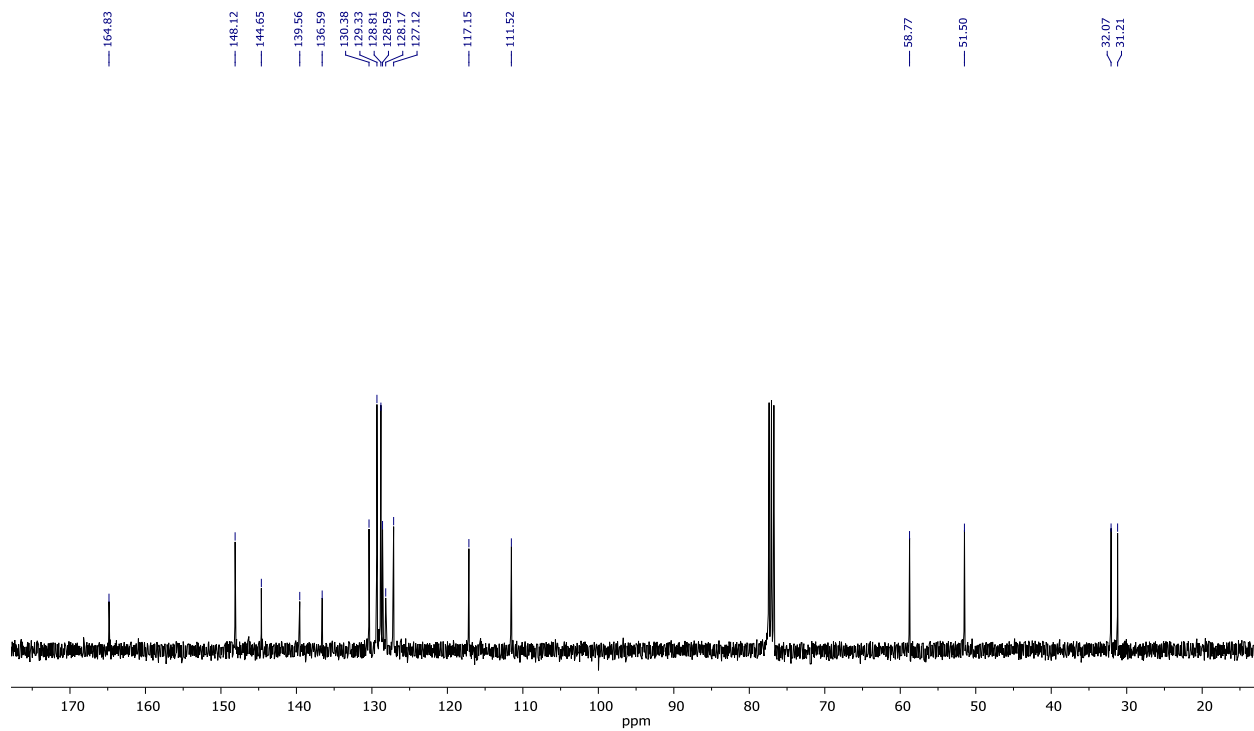

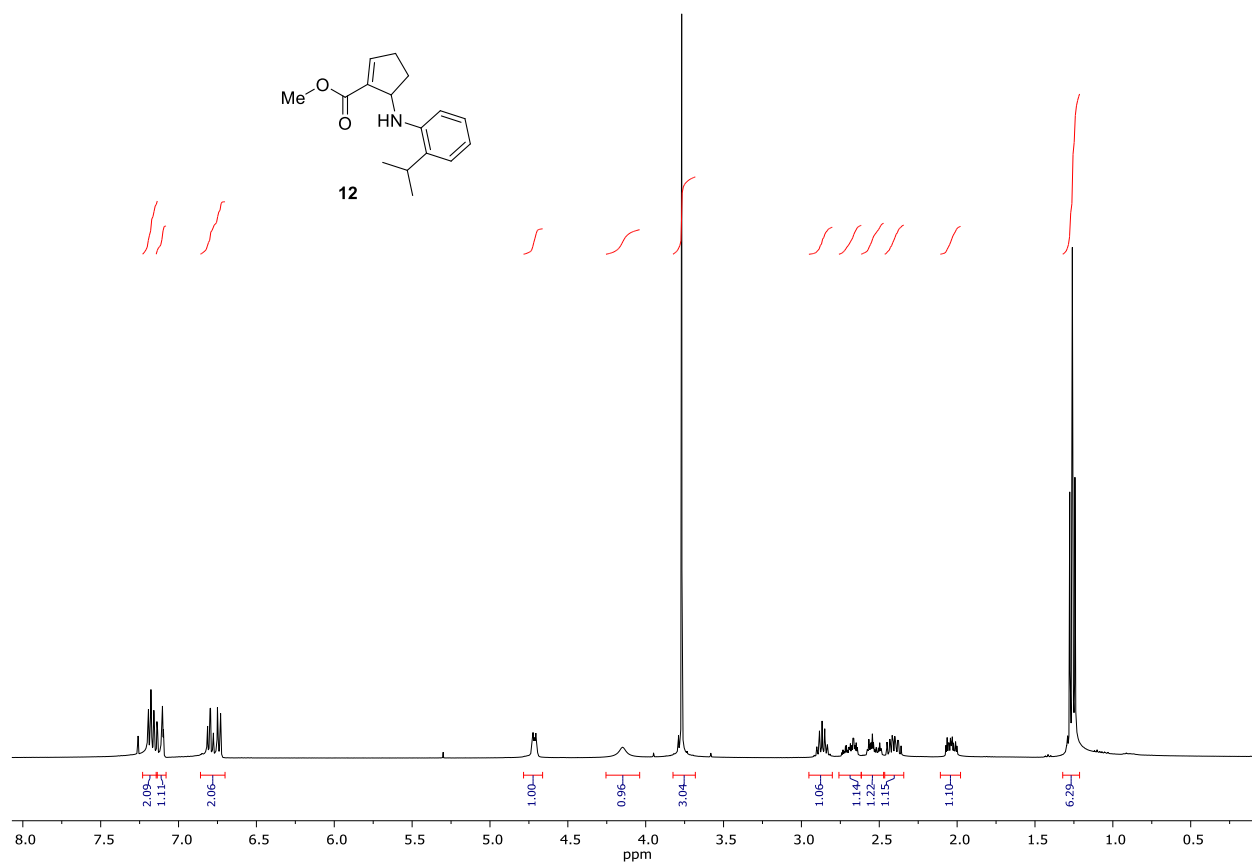

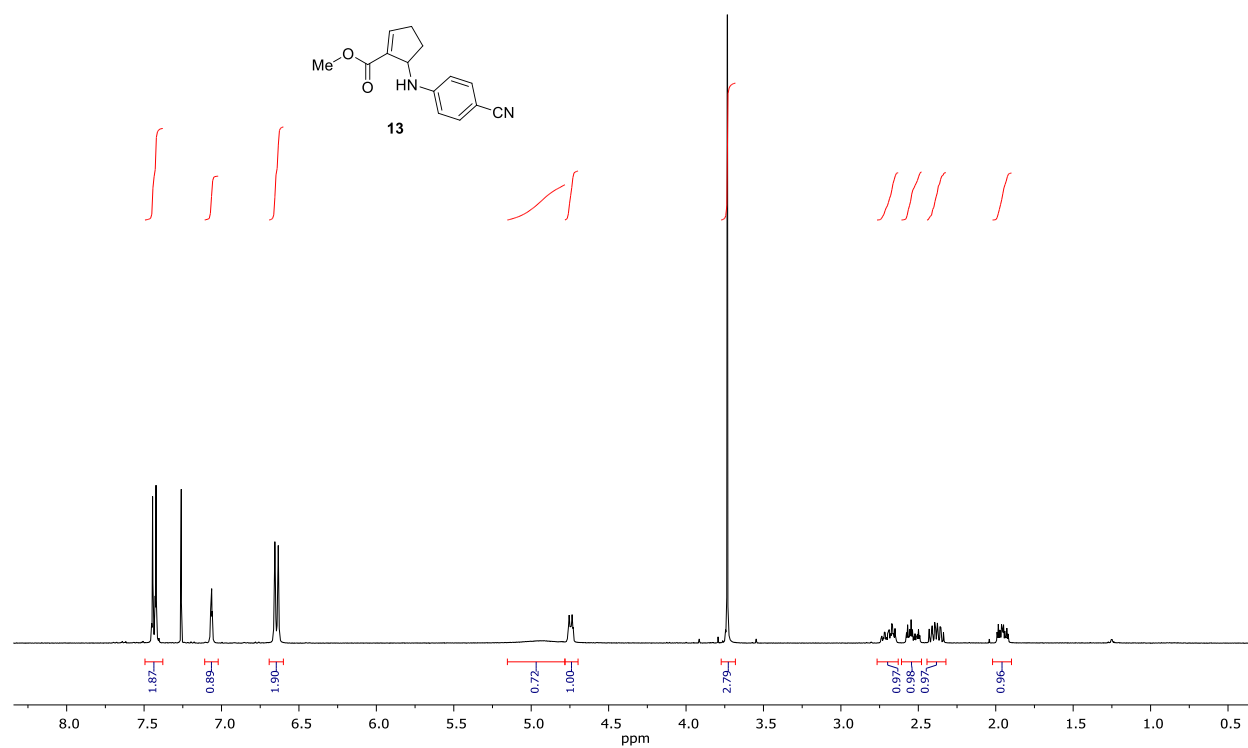

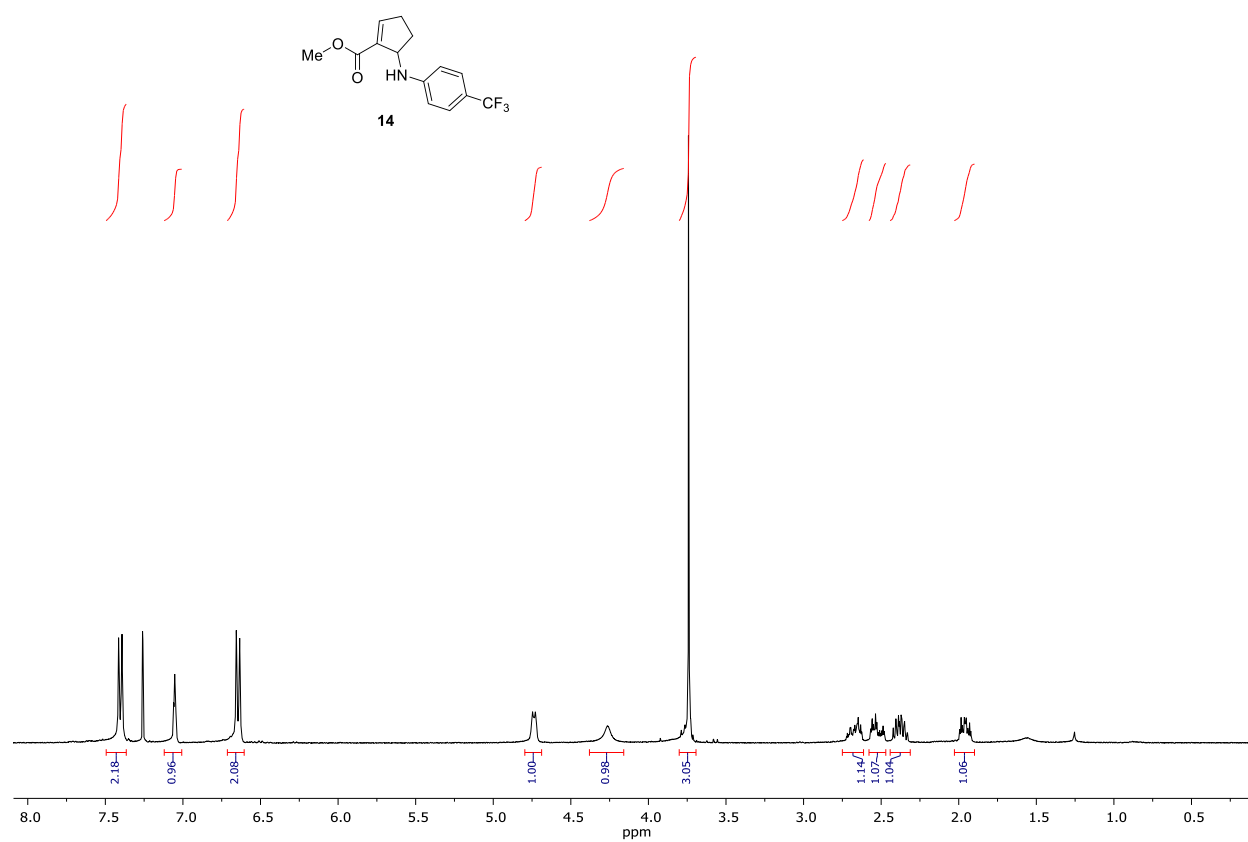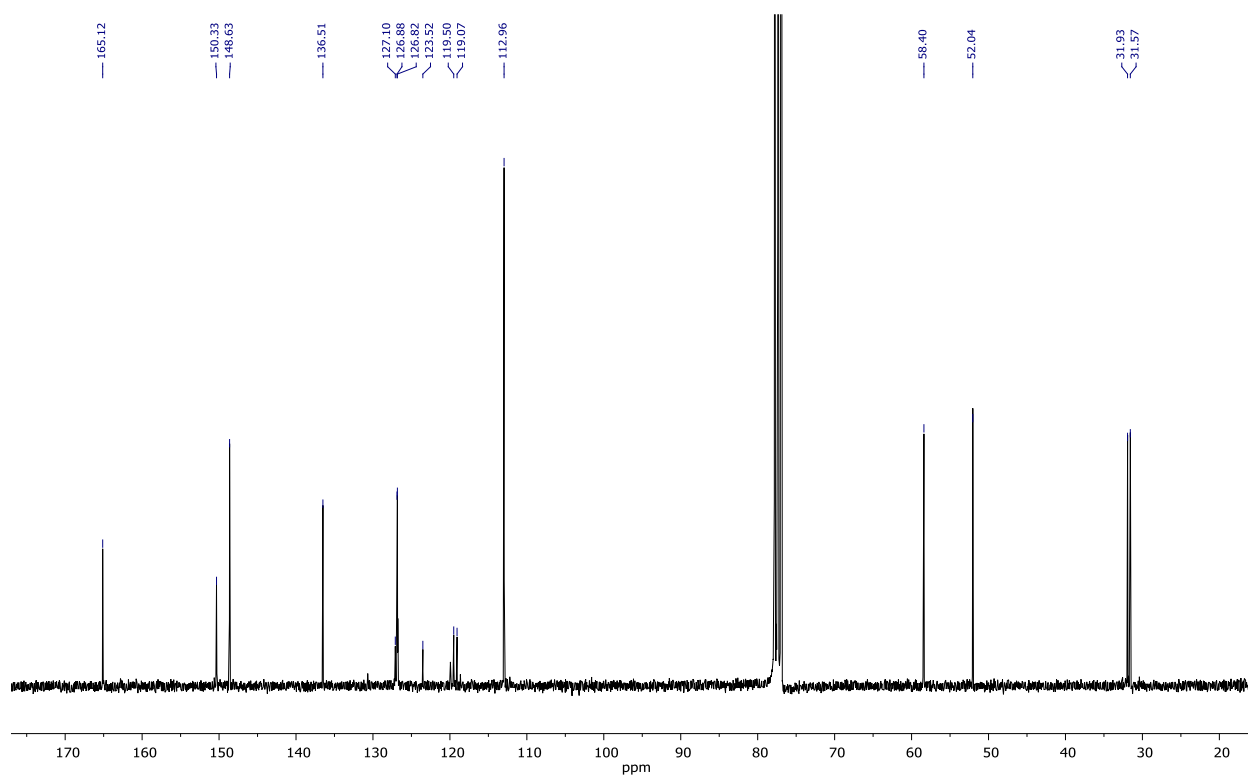



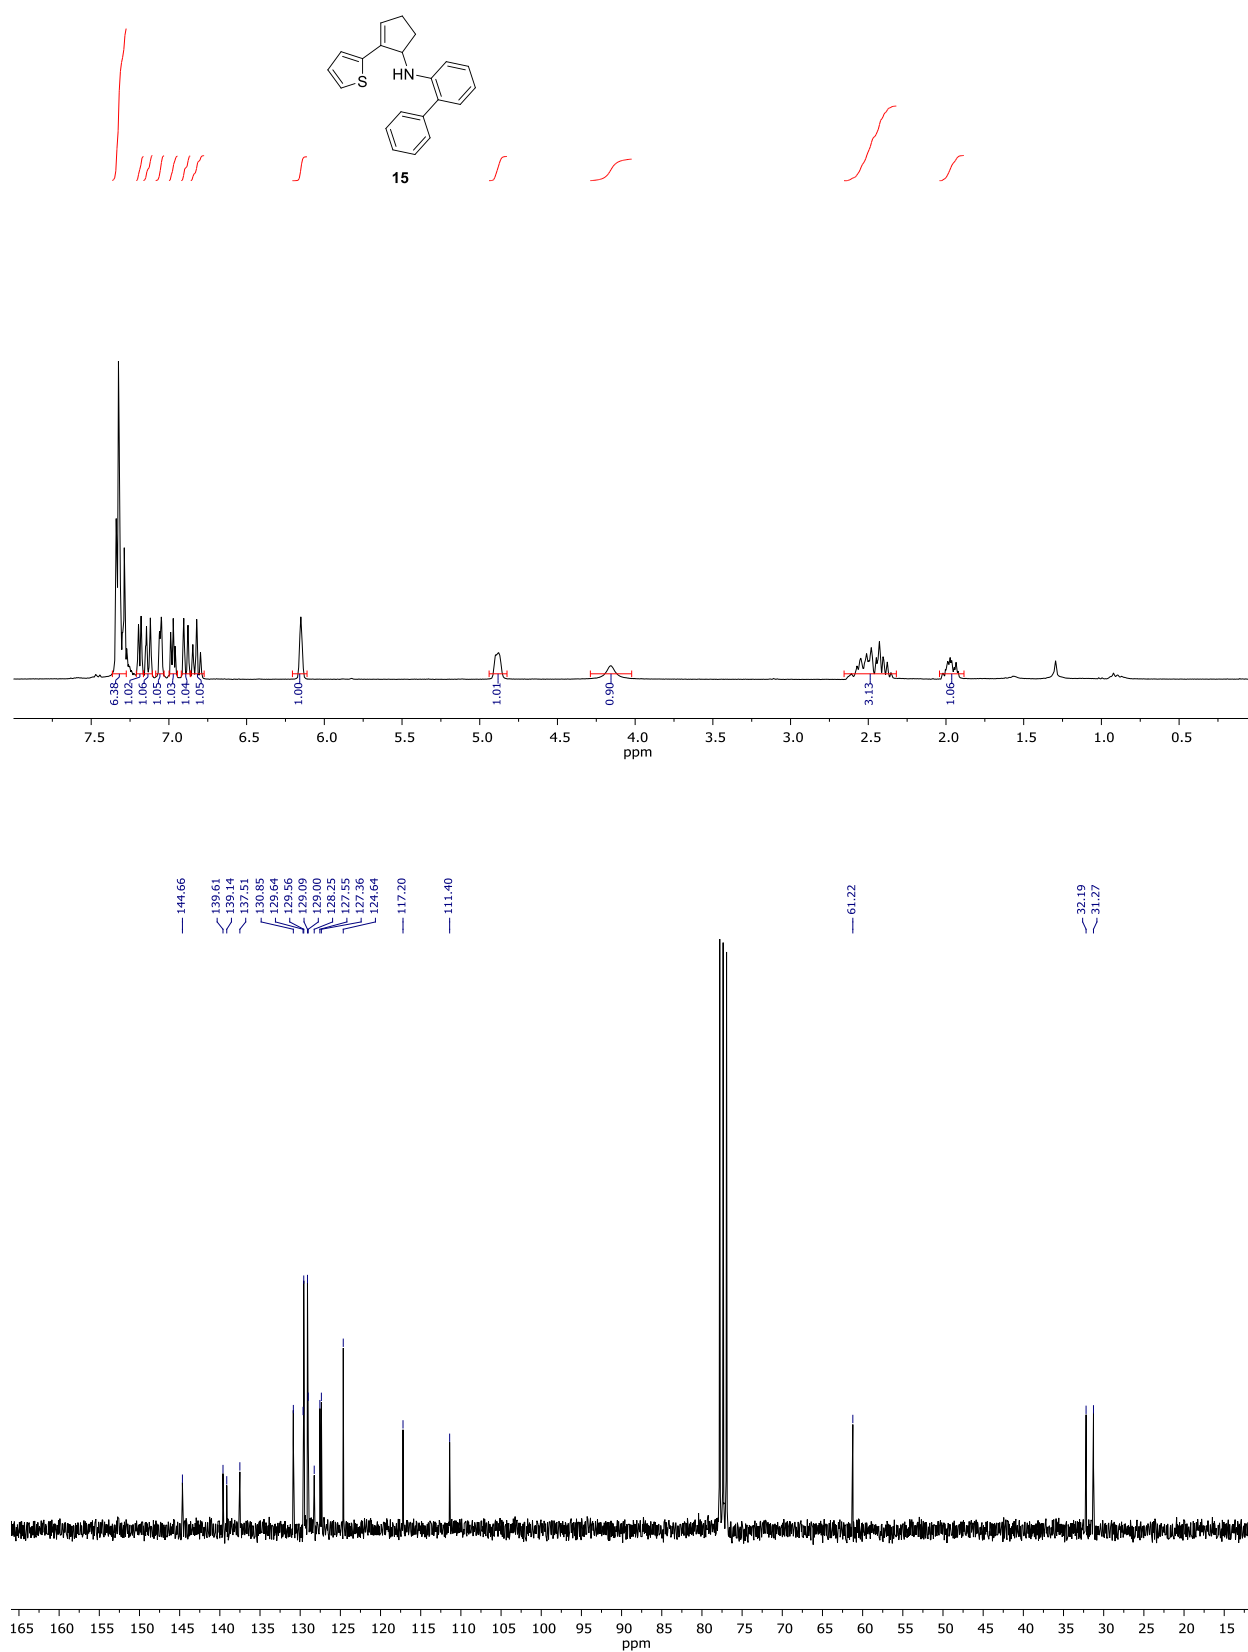

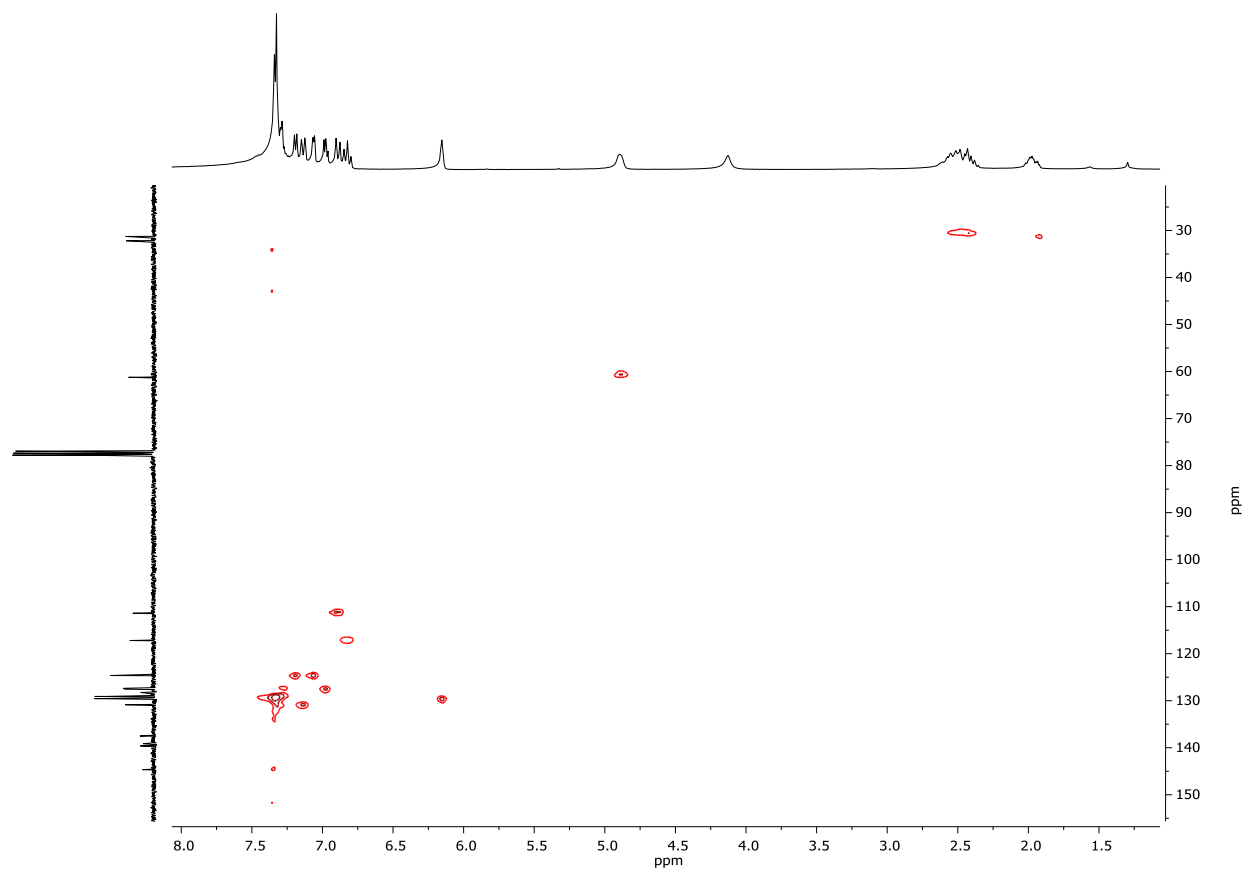

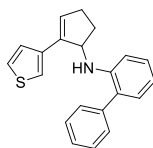

16

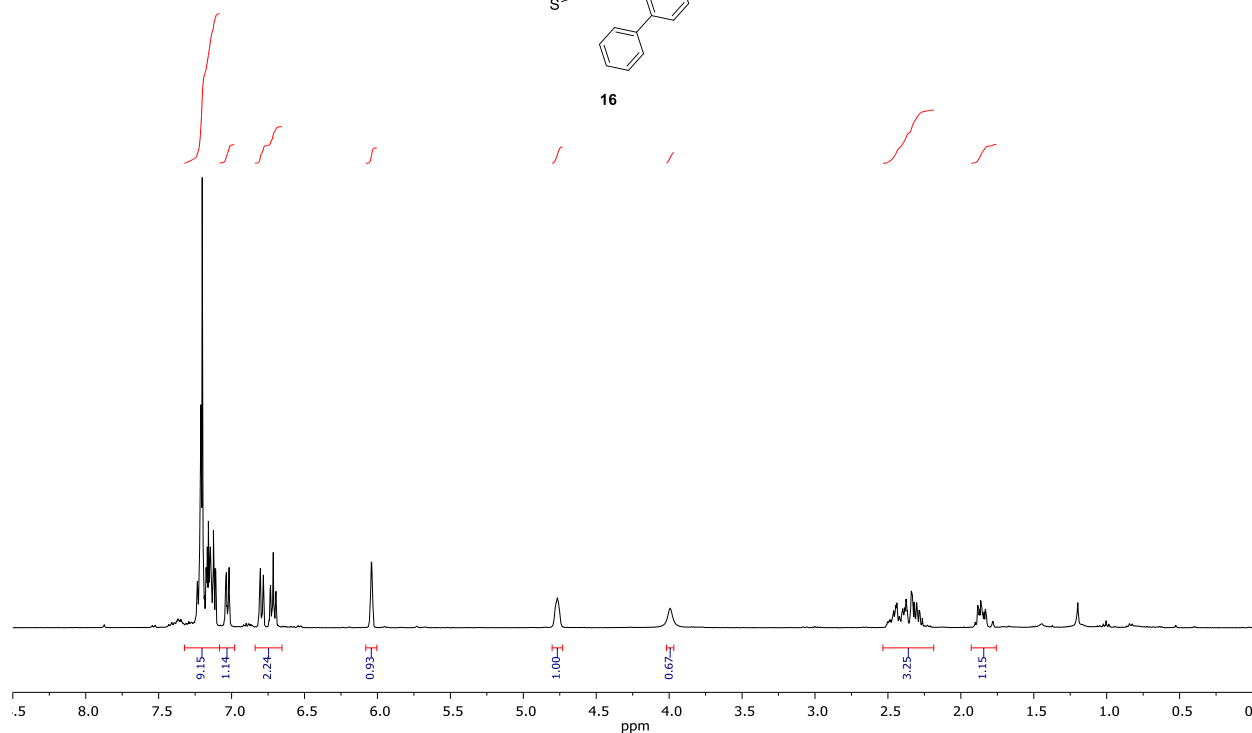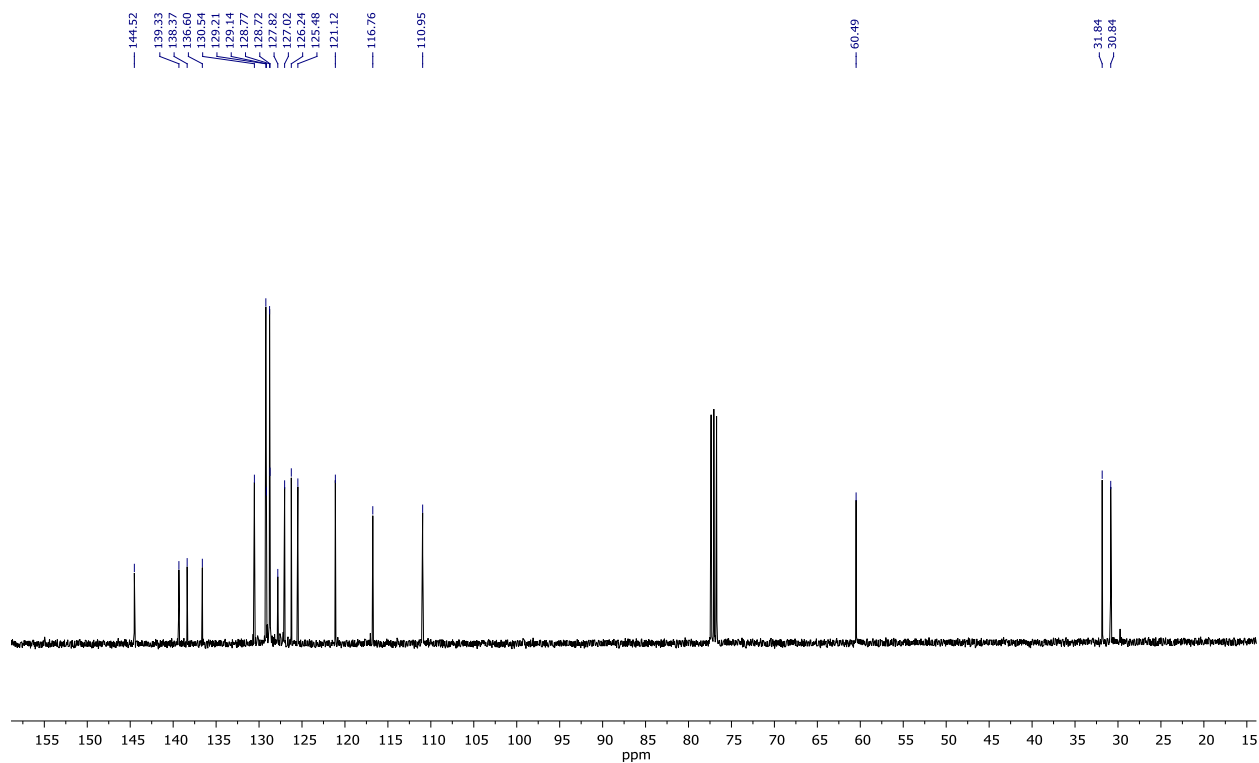

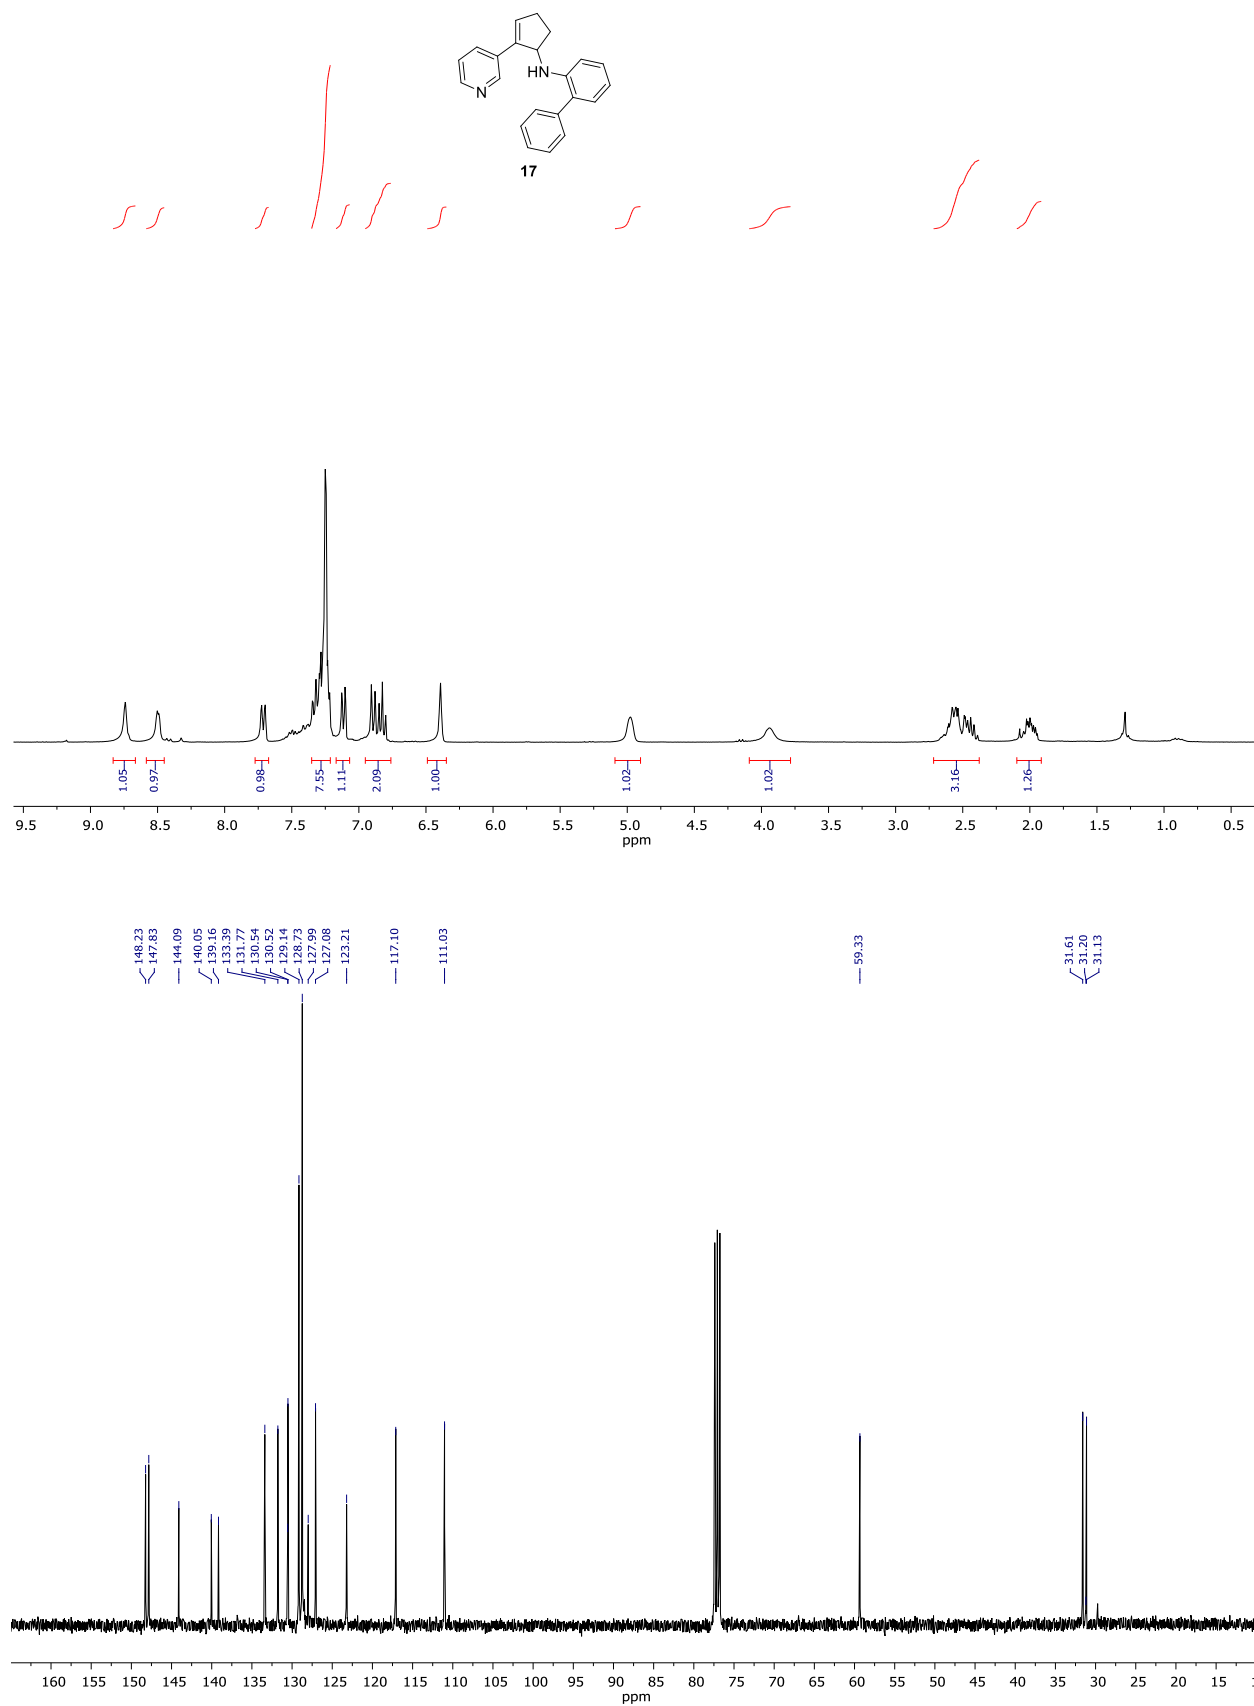

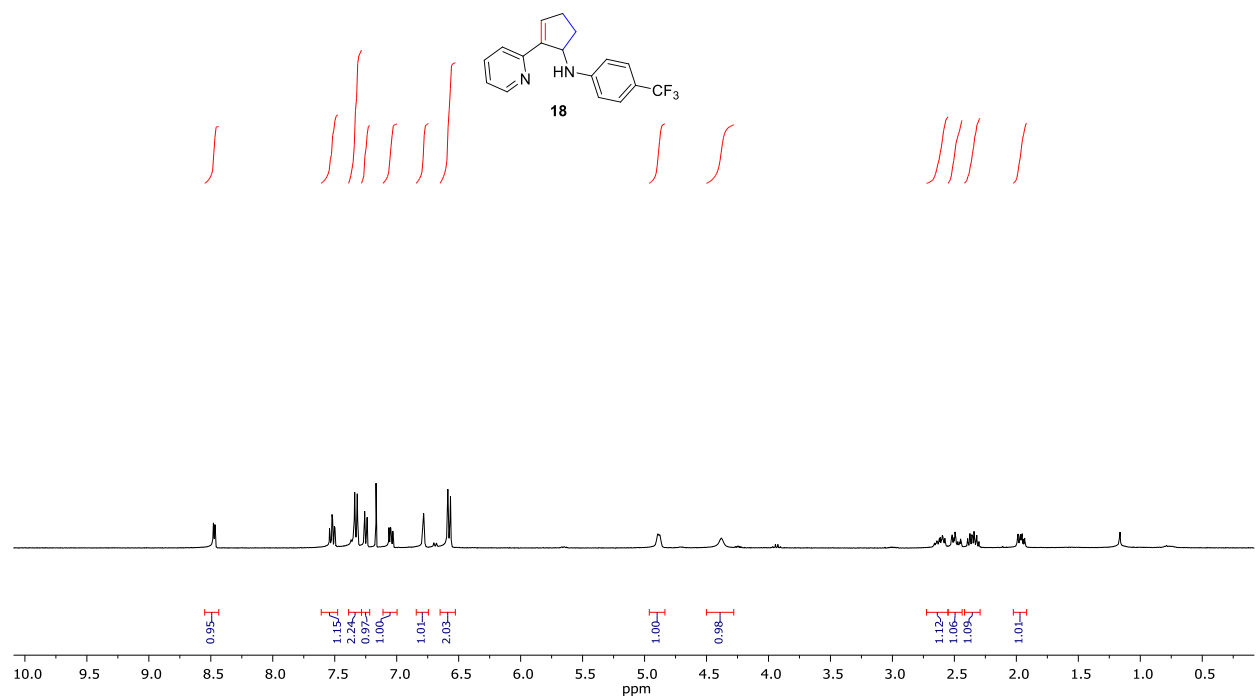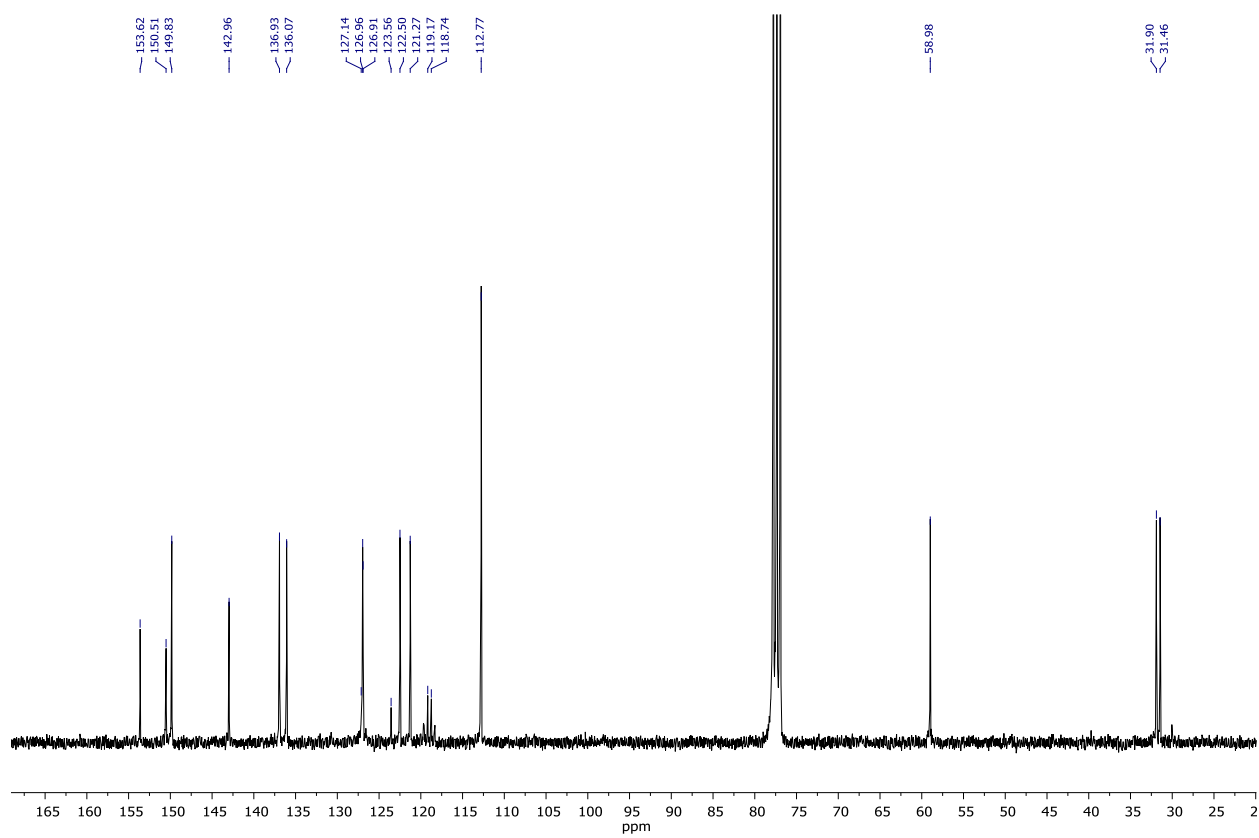

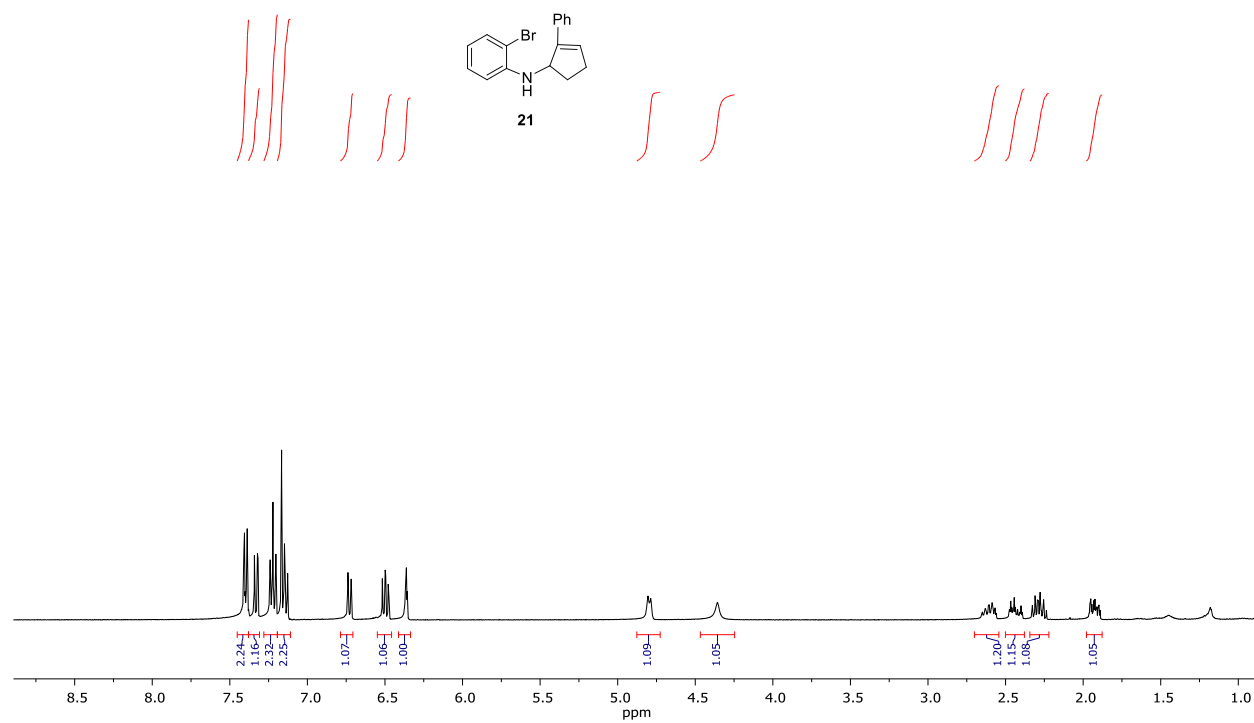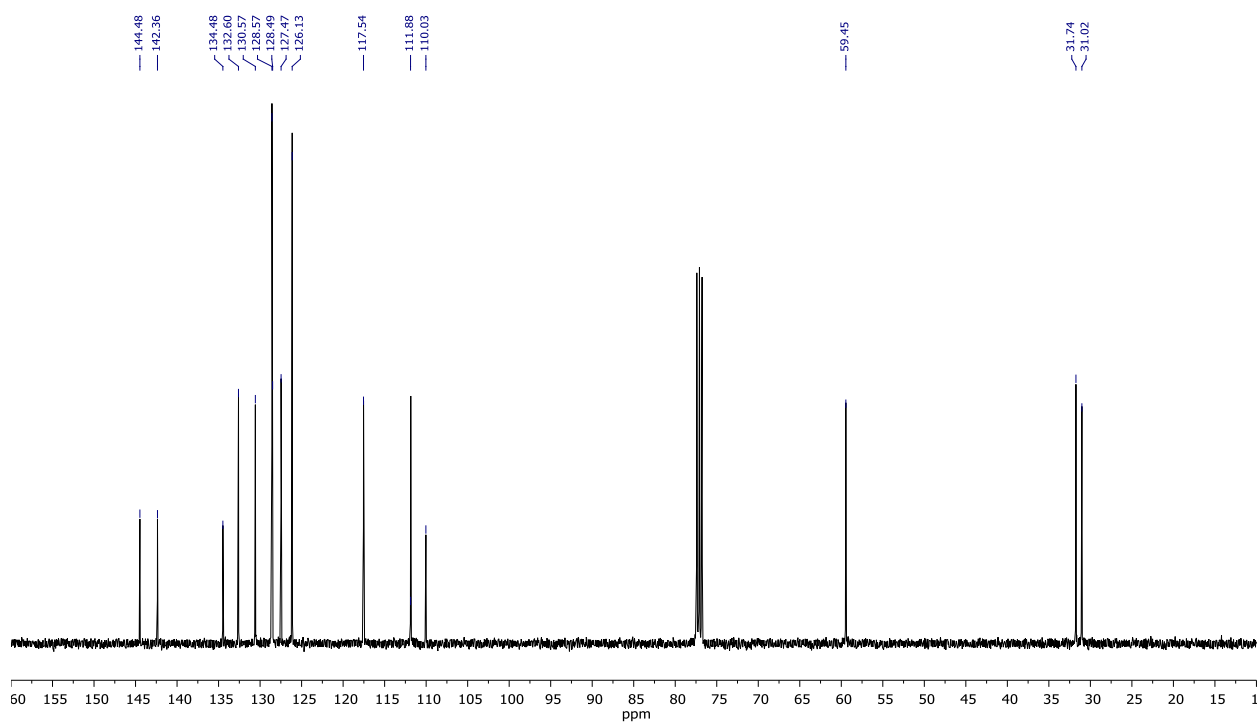

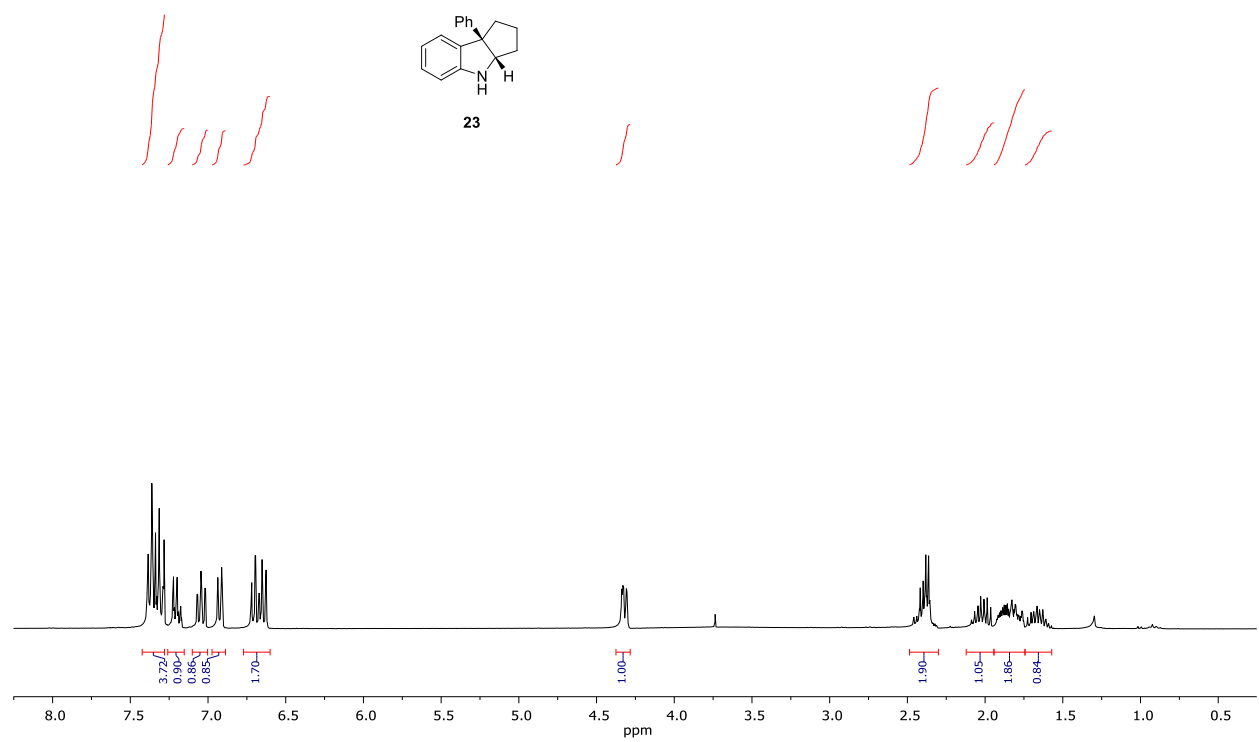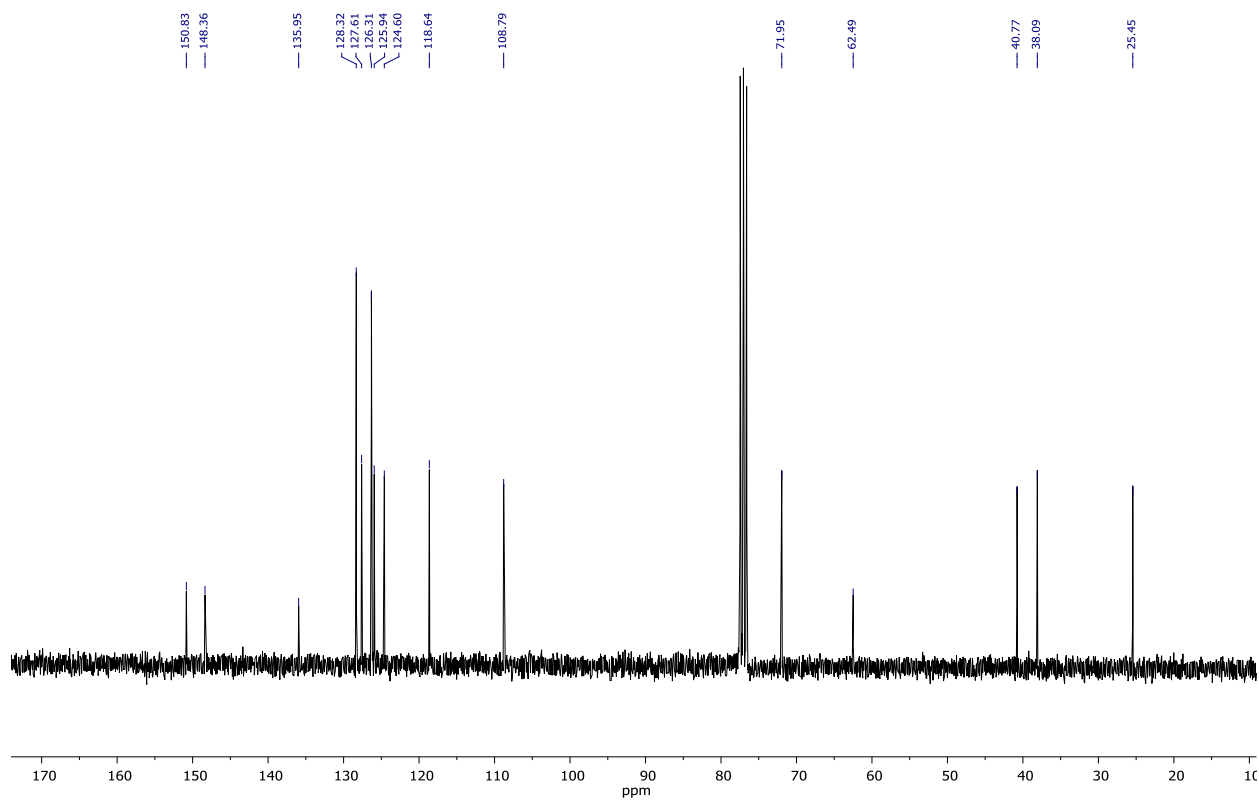

Supplement: Additional file 1 [file 1860-5397-10-96-S1.pdf]
